# Supplementary material for: Cell-cycle inhibition and immune microenvironment in breast cancer treated with ribociclib and letrozole or chemotherapy
Source: PubMed Central journal article supplement (PMC10918094; doi:10.1038/s41523-024-00625-7), 2024-03-06
Supplement: 41523_2024_625_MOESM1_ESM.pdf [file 41523_2024_625_MOESM1_ESM.pdf]

## **Supplementary Figures**

|                               |       |           |
|-------------------------------|-------|-----------|
| <b>Supplementary Figure 1</b> | ..... | <b>1</b>  |
| <b>Supplementary Figure 2</b> | ..... | <b>3</b>  |
| <b>Supplementary Figure 3</b> | ..... | <b>4</b>  |
| <b>Supplementary Figure 4</b> | ..... | <b>6</b>  |
| <b>Supplementary Figure 5</b> | ..... | <b>7</b>  |
| <b>Supplementary Figure 6</b> | ..... | <b>8</b>  |
| <b>Supplementary Table 1</b>  | ..... | <b>9</b>  |
| <b>Supplementary Table 2</b>  | ..... | <b>18</b> |

## Supplementary Figure 1

A) Consort Diagram B) Diagram of the shared or individual tumor Ki67 IHC, TILs levels, PAM50 and RNA sequencing data successfully performed on each of the 106 patients of CORALLEEN trial.

A)

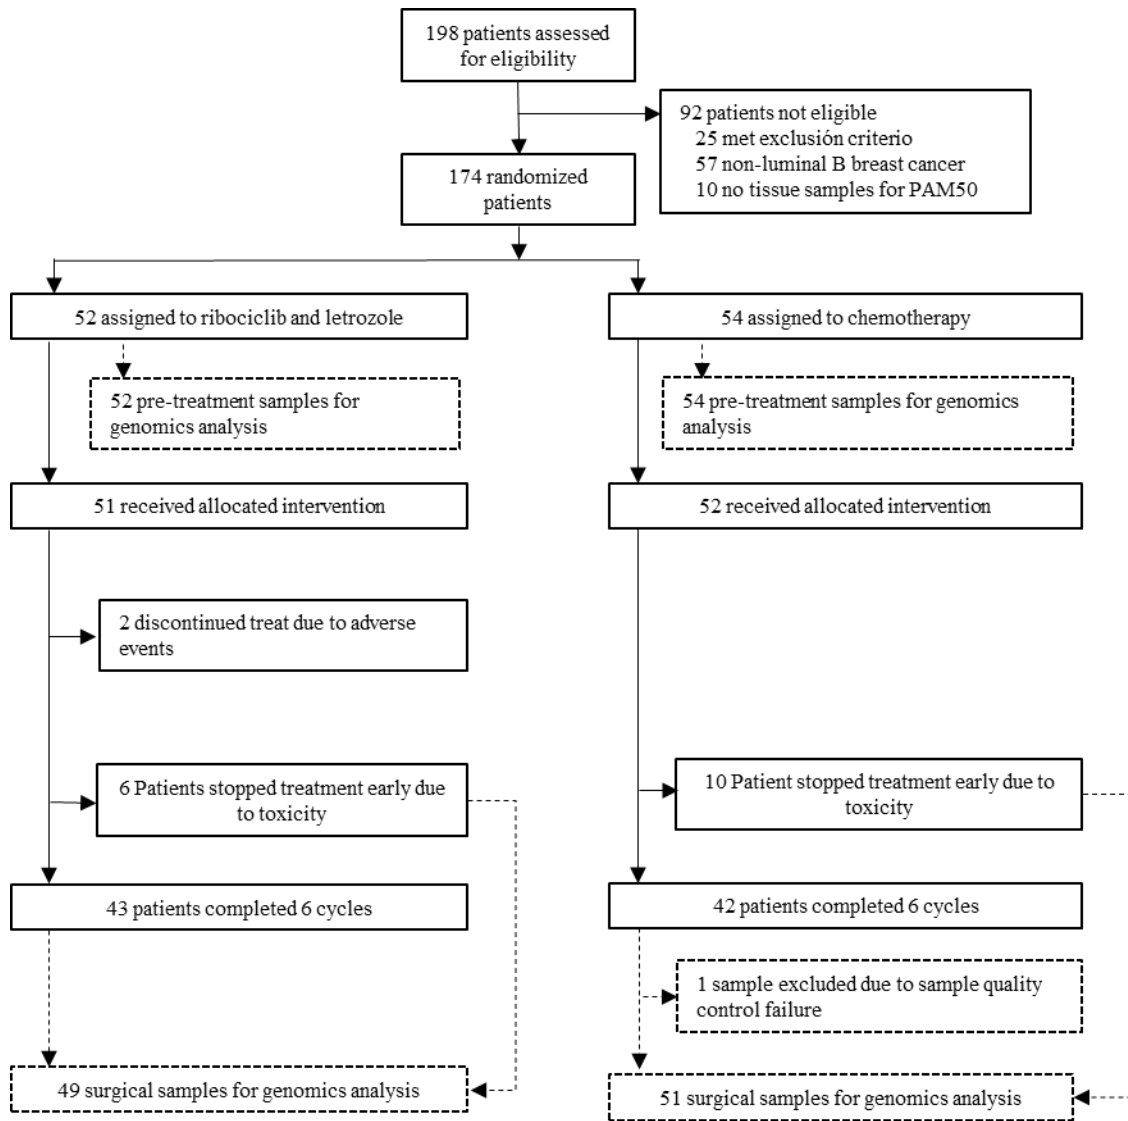

B)

Chemotherapy arm

|                   |          | 1                 | 2 | 3 | 4 | 5 | 6 | 7 | 8 | 9 | 10 | 11 | 12 | 13 | 14 | 15 | 16 | 17 | 18 | 19 | 20 | 21 | 22 | 23 | 24 | 25 | 26 | 27 | 28 | 29 | 30 | 31 | 32 | 33 | 34 | 35 | 36 | 37 | 38 | 39 | 40 | 41 | 42 | 43 | 44 | 45 | 46 | 47 | 48 | 49 | 50 | 51 | 52 | 53 | 54        | N samples (%) |
|-------------------|----------|-------------------|---|---|---|---|---|---|---|---|----|----|----|----|----|----|----|----|----|----|----|----|----|----|----|----|----|----|----|----|----|----|----|----|----|----|----|----|----|----|----|----|----|----|----|----|----|----|----|----|----|----|----|----|-----------|---------------|
| Screening samples | Ki67     | [Blue bar]        |   |   |   |   |   |   |   |   |    |    |    |    |    |    |    |    |    |    |    |    |    |    |    |    |    |    |    |    |    |    |    |    |    |    |    |    |    |    |    |    |    |    |    |    |    |    |    |    |    |    |    |    | 53 (98.1) |               |
|                   | H&E TILs | [Dark Blue bar]   |   |   |   |   |   |   |   |   |    |    |    |    |    |    |    |    |    |    |    |    |    |    |    |    |    |    |    |    |    |    |    |    |    |    |    |    |    |    |    |    |    |    |    |    |    |    |    |    |    |    |    |    | 52 (96.3) |               |
|                   | PAM50    | [Light Green bar] |   |   |   |   |   |   |   |   |    |    |    |    |    |    |    |    |    |    |    |    |    |    |    |    |    |    |    |    |    |    |    |    |    |    |    |    |    |    |    |    |    |    |    |    |    |    |    |    |    |    |    |    | 54 (100)  |               |
|                   | RNA seq  | [Green bar]       |   |   |   |   |   |   |   |   |    |    |    |    |    |    |    |    |    |    |    |    |    |    |    |    |    |    |    |    |    |    |    |    |    |    |    |    |    |    |    |    |    |    |    |    |    |    |    |    |    |    |    |    | 43 (79.6) |               |
| Week 2 samples    | Ki67     | [Blue bar]        |   |   |   |   |   |   |   |   |    |    |    |    |    |    |    |    |    |    |    |    |    |    |    |    |    |    |    |    |    |    |    |    |    |    |    |    |    |    |    |    |    |    |    |    |    |    |    |    |    |    |    |    | 45 (83.3) |               |
|                   | H&E TILs | [Dark Blue bar]   |   |   |   |   |   |   |   |   |    |    |    |    |    |    |    |    |    |    |    |    |    |    |    |    |    |    |    |    |    |    |    |    |    |    |    |    |    |    |    |    |    |    |    |    |    |    |    |    |    |    |    |    | 48 (88.8) |               |
|                   | PAM50    | [Light Green bar] |   |   |   |   |   |   |   |   |    |    |    |    |    |    |    |    |    |    |    |    |    |    |    |    |    |    |    |    |    |    |    |    |    |    |    |    |    |    |    |    |    |    |    |    |    |    |    |    |    |    |    |    | 47 (87.1) |               |
|                   | RNA seq  | [Green bar]       |   |   |   |   |   |   |   |   |    |    |    |    |    |    |    |    |    |    |    |    |    |    |    |    |    |    |    |    |    |    |    |    |    |    |    |    |    |    |    |    |    |    |    |    |    |    |    |    |    |    |    |    | 43 (79.6) |               |
| Surgery Samples   | Ki67     | [Blue bar]        |   |   |   |   |   |   |   |   |    |    |    |    |    |    |    |    |    |    |    |    |    |    |    |    |    |    |    |    |    |    |    |    |    |    |    |    |    |    |    |    |    |    |    |    |    |    |    |    |    |    |    |    | 47 (87.0) |               |
|                   | H&E TILs | [Dark Blue bar]   |   |   |   |   |   |   |   |   |    |    |    |    |    |    |    |    |    |    |    |    |    |    |    |    |    |    |    |    |    |    |    |    |    |    |    |    |    |    |    |    |    |    |    |    |    |    |    |    |    |    |    |    | 46 (85.2) |               |
|                   | PAM50    | [Light Green bar] |   |   |   |   |   |   |   |   |    |    |    |    |    |    |    |    |    |    |    |    |    |    |    |    |    |    |    |    |    |    |    |    |    |    |    |    |    |    |    |    |    |    |    |    |    |    |    |    |    |    |    |    | 51 (94.4) |               |
|                   | RNA seq  | [Green bar]       |   |   |   |   |   |   |   |   |    |    |    |    |    |    |    |    |    |    |    |    |    |    |    |    |    |    |    |    |    |    |    |    |    |    |    |    |    |    |    |    |    |    |    |    |    |    |    |    |    |    |    |    | 45 (83.3) |               |

Ribociclib arm

|                   |          | 1                 | 2 | 3 | 4 | 5 | 6 | 7 | 8 | 9 | 10 | 11 | 12 | 13 | 14 | 15 | 16 | 17 | 18 | 19 | 20 | 21 | 22 | 23 | 24 | 25 | 26 | 27 | 28 | 29 | 30 | 31 | 32 | 33 | 34 | 35 | 36 | 37 | 38 | 39 | 40 | 41 | 42 | 43 | 44 | 45 | 46 | 47 | 48 | 49 | 50 | 51 | 52 | N samples (%) |
|-------------------|----------|-------------------|---|---|---|---|---|---|---|---|----|----|----|----|----|----|----|----|----|----|----|----|----|----|----|----|----|----|----|----|----|----|----|----|----|----|----|----|----|----|----|----|----|----|----|----|----|----|----|----|----|----|----|---------------|
| Screening samples | Ki67     | [Blue bar]        |   |   |   |   |   |   |   |   |    |    |    |    |    |    |    |    |    |    |    |    |    |    |    |    |    |    |    |    |    |    |    |    |    |    |    |    |    |    |    |    |    |    |    |    |    |    |    |    |    |    |    | 52 (100)      |
|                   | H&E TILs | [Dark Blue bar]   |   |   |   |   |   |   |   |   |    |    |    |    |    |    |    |    |    |    |    |    |    |    |    |    |    |    |    |    |    |    |    |    |    |    |    |    |    |    |    |    |    |    |    |    |    |    |    |    |    |    |    | 52 (100)      |
|                   | PAM50    | [Light Green bar] |   |   |   |   |   |   |   |   |    |    |    |    |    |    |    |    |    |    |    |    |    |    |    |    |    |    |    |    |    |    |    |    |    |    |    |    |    |    |    |    |    |    |    |    |    |    |    |    |    |    |    | 52 (100)      |
|                   | RNA seq  | [Green bar]       |   |   |   |   |   |   |   |   |    |    |    |    |    |    |    |    |    |    |    |    |    |    |    |    |    |    |    |    |    |    |    |    |    |    |    |    |    |    |    |    |    |    |    |    |    |    |    |    |    |    |    | 41 (78.8)     |
| Week 2 samples    | Ki67     | [Blue bar]        |   |   |   |   |   |   |   |   |    |    |    |    |    |    |    |    |    |    |    |    |    |    |    |    |    |    |    |    |    |    |    |    |    |    |    |    |    |    |    |    |    |    |    |    |    |    |    |    |    |    |    | 48 (92.3)     |
|                   | H&E TILs | [Dark Blue bar]   |   |   |   |   |   |   |   |   |    |    |    |    |    |    |    |    |    |    |    |    |    |    |    |    |    |    |    |    |    |    |    |    |    |    |    |    |    |    |    |    |    |    |    |    |    |    |    |    |    |    |    | 49 (94.2)     |
|                   | PAM50    | [Light Green bar] |   |   |   |   |   |   |   |   |    |    |    |    |    |    |    |    |    |    |    |    |    |    |    |    |    |    |    |    |    |    |    |    |    |    |    |    |    |    |    |    |    |    |    |    |    |    |    |    |    |    |    | 50 (96.2)     |
|                   | RNA seq  | [Green bar]       |   |   |   |   |   |   |   |   |    |    |    |    |    |    |    |    |    |    |    |    |    |    |    |    |    |    |    |    |    |    |    |    |    |    |    |    |    |    |    |    |    |    |    |    |    |    |    |    |    |    |    | 46 (88.5)     |
| Surgery Samples   | Ki67     | [Blue bar]        |   |   |   |   |   |   |   |   |    |    |    |    |    |    |    |    |    |    |    |    |    |    |    |    |    |    |    |    |    |    |    |    |    |    |    |    |    |    |    |    |    |    |    |    |    |    |    |    |    |    |    | 48 (92.3)     |
|                   | H&E TILs | [Dark Blue bar]   |   |   |   |   |   |   |   |   |    |    |    |    |    |    |    |    |    |    |    |    |    |    |    |    |    |    |    |    |    |    |    |    |    |    |    |    |    |    |    |    |    |    |    |    |    |    |    |    |    |    |    | 49 (94.2)     |
|                   | PAM50    | [Light Green bar] |   |   |   |   |   |   |   |   |    |    |    |    |    |    |    |    |    |    |    |    |    |    |    |    |    |    |    |    |    |    |    |    |    |    |    |    |    |    |    |    |    |    |    |    |    |    |    |    |    |    |    | 50 (96.2)     |
|                   | RNA seq  | [Green bar]       |   |   |   |   |   |   |   |   |    |    |    |    |    |    |    |    |    |    |    |    |    |    |    |    |    |    |    |    |    |    |    |    |    |    |    |    |    |    |    |    |    |    |    |    |    |    |    |    |    |    |    | 37 (71.2)     |

## Supplementary Figure 2

Changes in Ki67 levels across 3 time-points. (A) Ribociclib and letrozole arm; (B) Chemotherapy. Green line reflects any decrease in Ki67 levels between 2 time-points and red line reflects any increase in Ki67 levels. p-value was obtained after performing Wilcoxon signed-rank test.

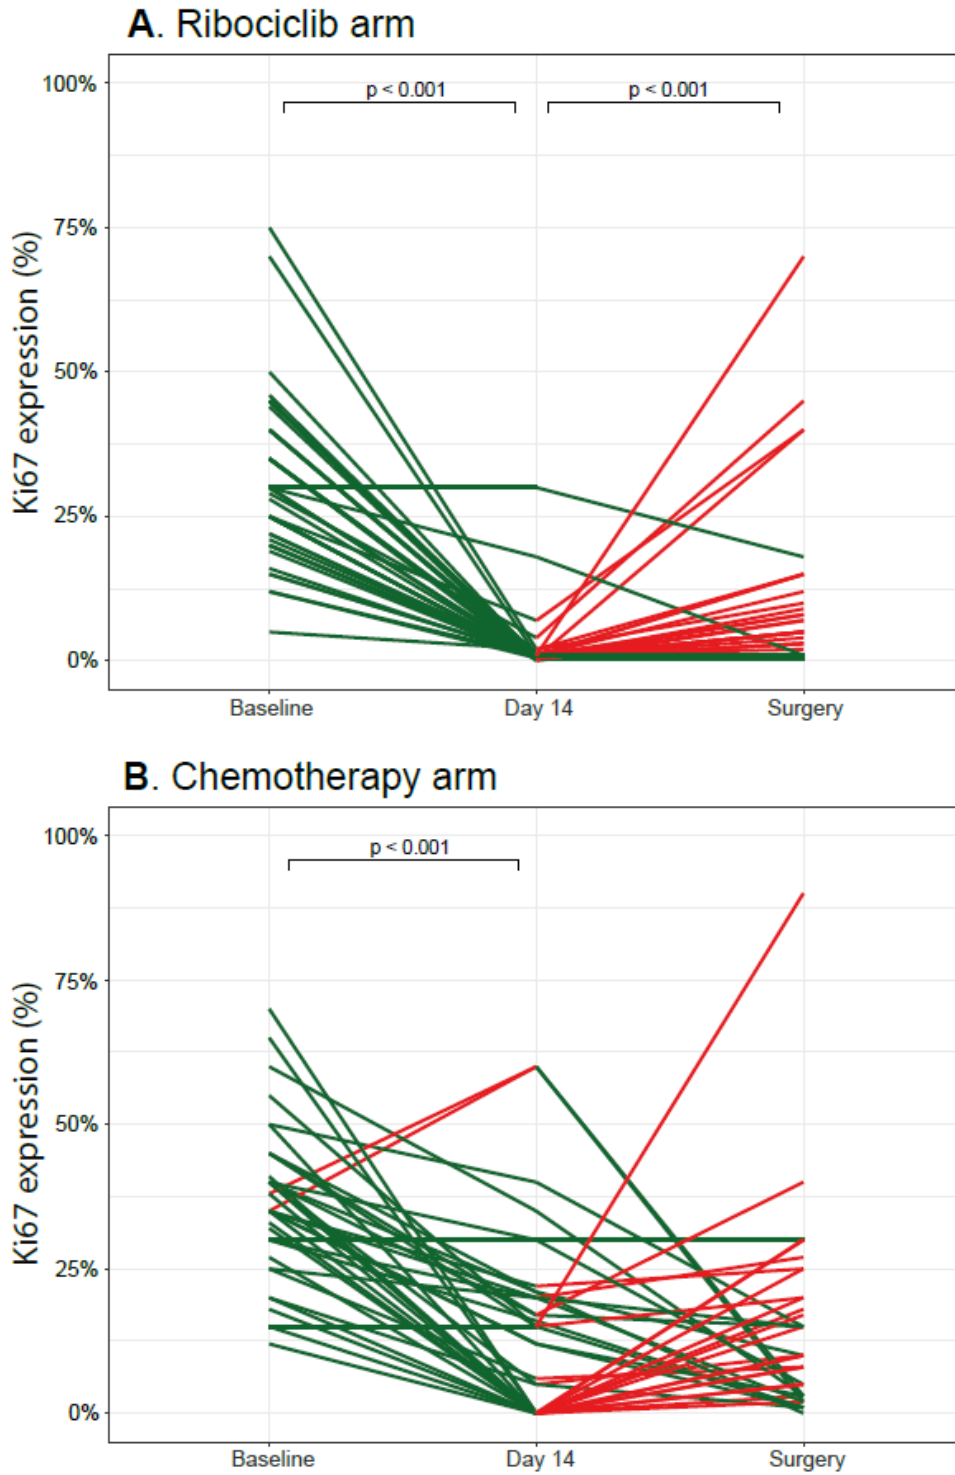

### Supplementary Figure 3

Expression of Ki67 in surgical samples in patients achieving a response versus stable disease by magnetic resonance imaging (MRI) at 24 weeks of treatment. (A) of ribociclib and letrozole arm; (B) of chemotherapy. Expression of Ki67 in surgical samples in patients achieving a low PAM50-ROR vs intermediate vs high (C) after ribociclib and letrozole arm; (D) after chemotherapy. Correlation of Ki67 and PAM50-ROR in surgical samples after neoadjuvant (E) ribociclib and letrozole (F) after chemotherapy. Expression of Ki67 in surgical samples in patients achieving a PEPI score 0 vs 1-3 vs >4 (G) after ribociclib and letrozole arm; (H) after chemotherapy. Expression of Ki67 in surgical samples in patients achieving a residual cancer burden (RCB) 0 vs I vs II vs III (I) after ribociclib and letrozole arm; (J) after chemotherapy.

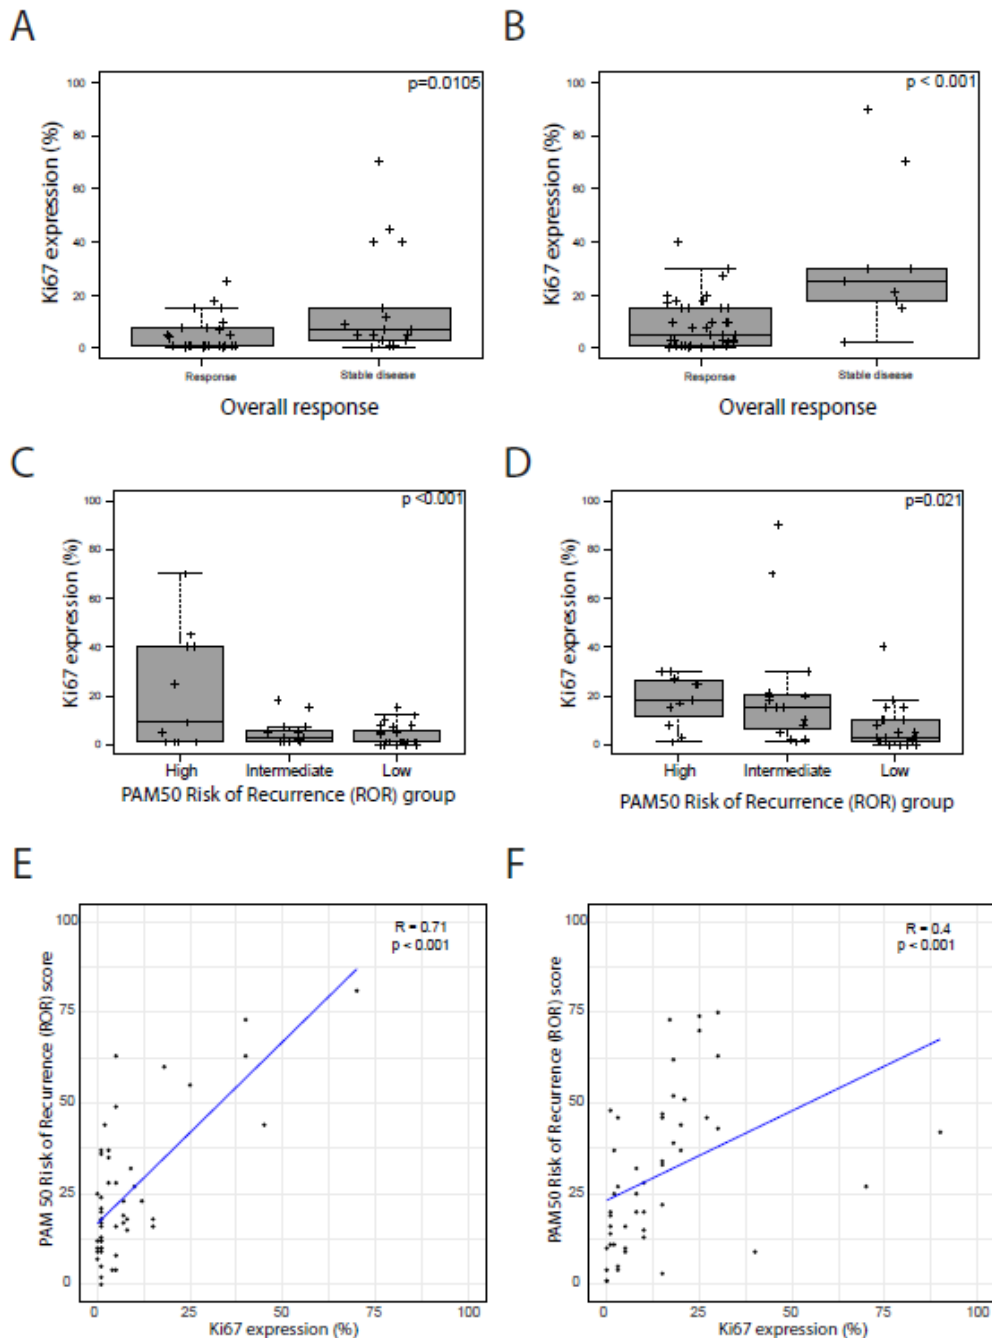

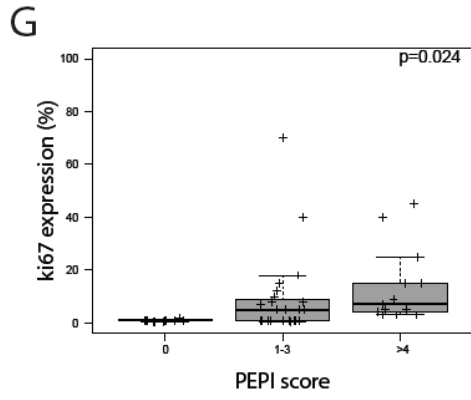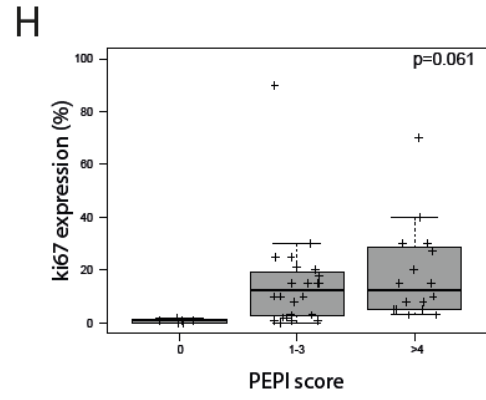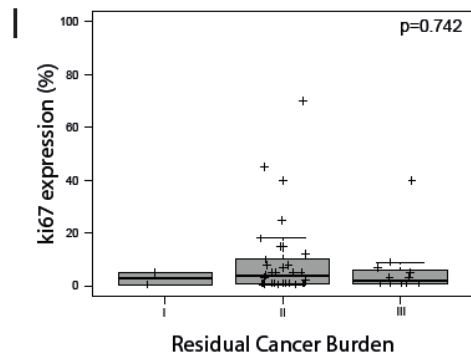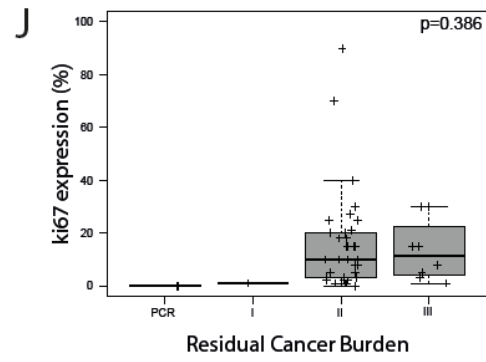

## Supplementary Figure 4

Breast cancer molecular subtype shifts between baseline, day 14 and surgery paired samples in ribociclib and letrozole group (left) and Chemotherapy group (right).

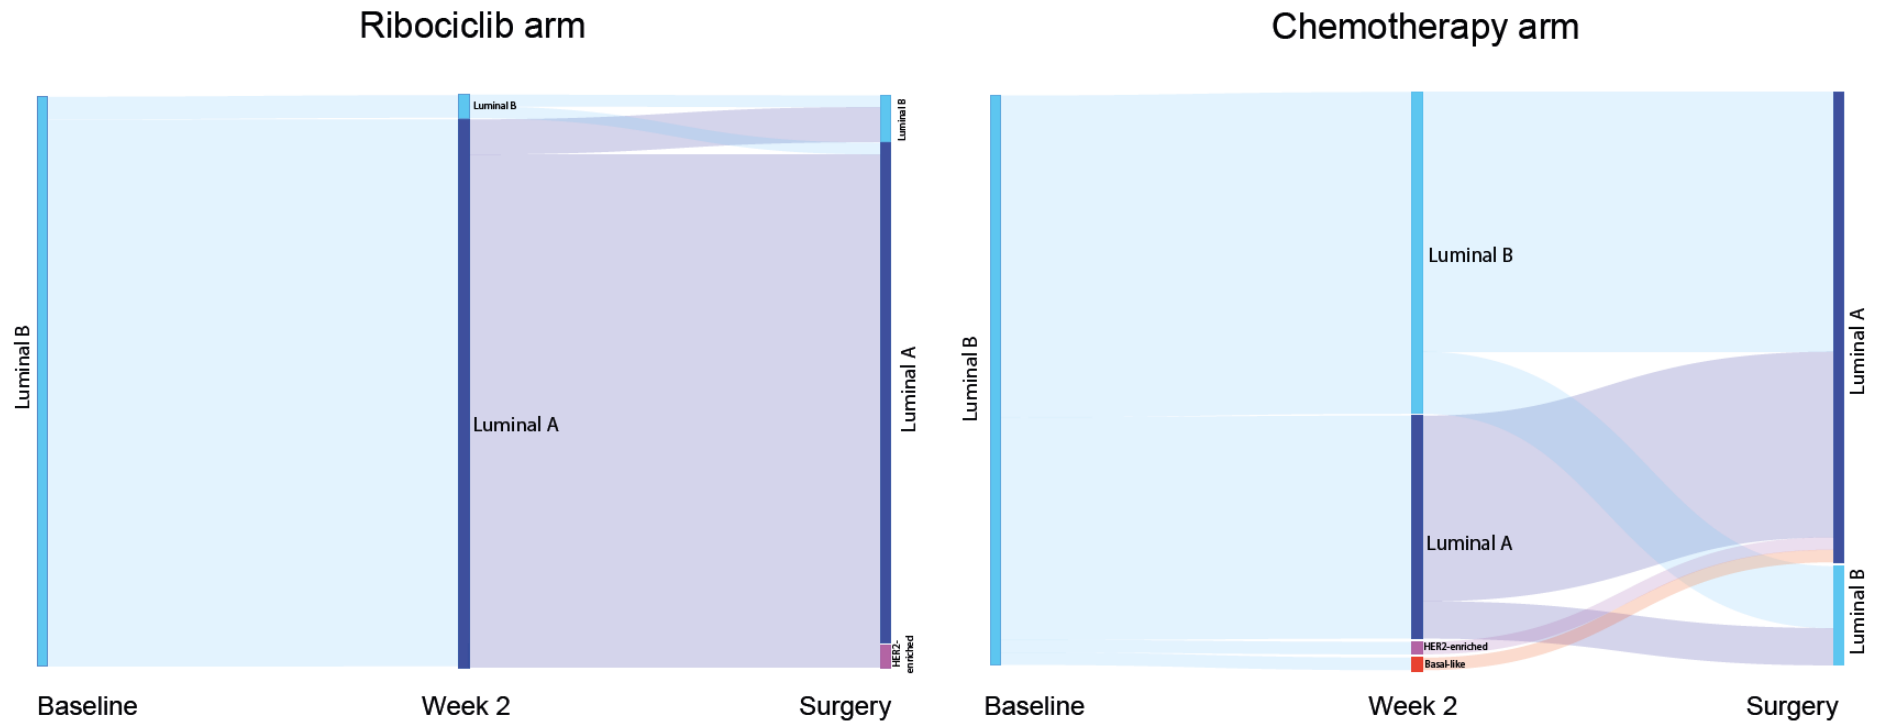

## Supplementary Figure 5

A) Individual paired TILs levels at baseline and surgery after treatment with ribociclib and letrozole and multi-agent chemotherapy. Colored lines represent individual patient data. B) Individual TILs levels at baseline, day 14, and surgery. Colored lines represent individual patient data. C) TILs levels across the three timepoints (Baseline, day 14, surgery) in ribociclib and chemotherapy arm. p-value was obtained after performing ANOVA test. D) Changes in Ki67 levels across 3 time-points. (Left) Ribociclib and letrozole arm; (ERight) Chemotherapy. Green line reflects any decrease in TILs levels between 2 time-points and red line reflects any increase in TILs levels. p-value was obtained after performing Wilcoxon signed-rank test.

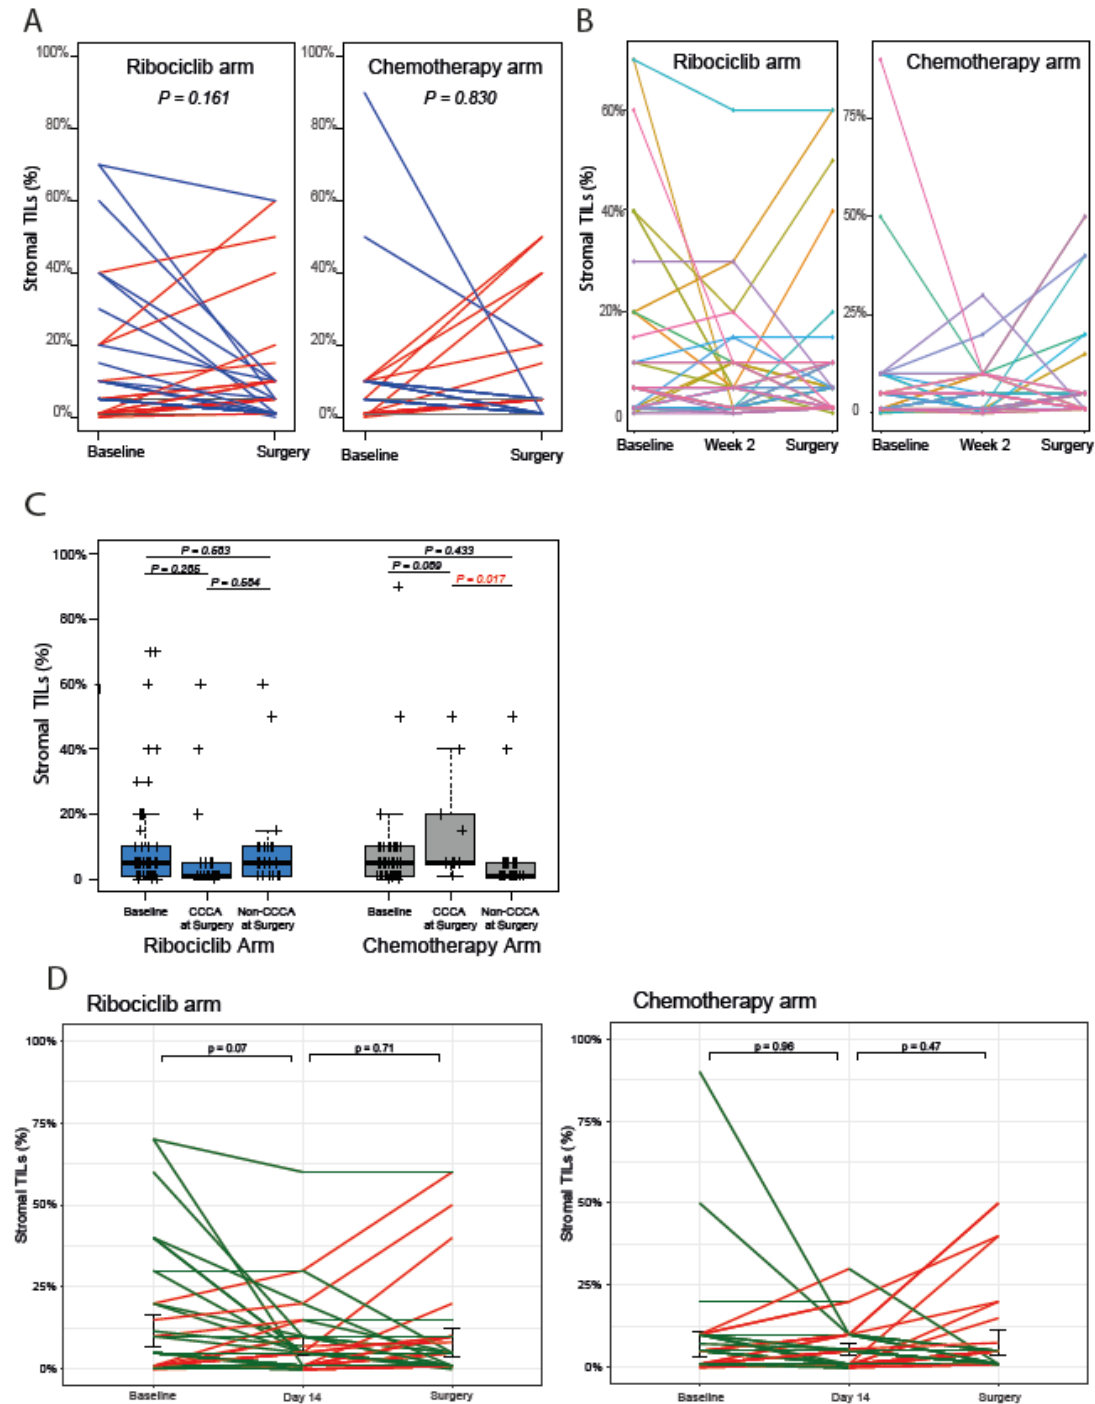



## Supplementary Figure 6

Spearman correlation matrix for continuous TIL quantification and top 20 most correlated immune signatures, ordered by the correlation coefficients with TILs

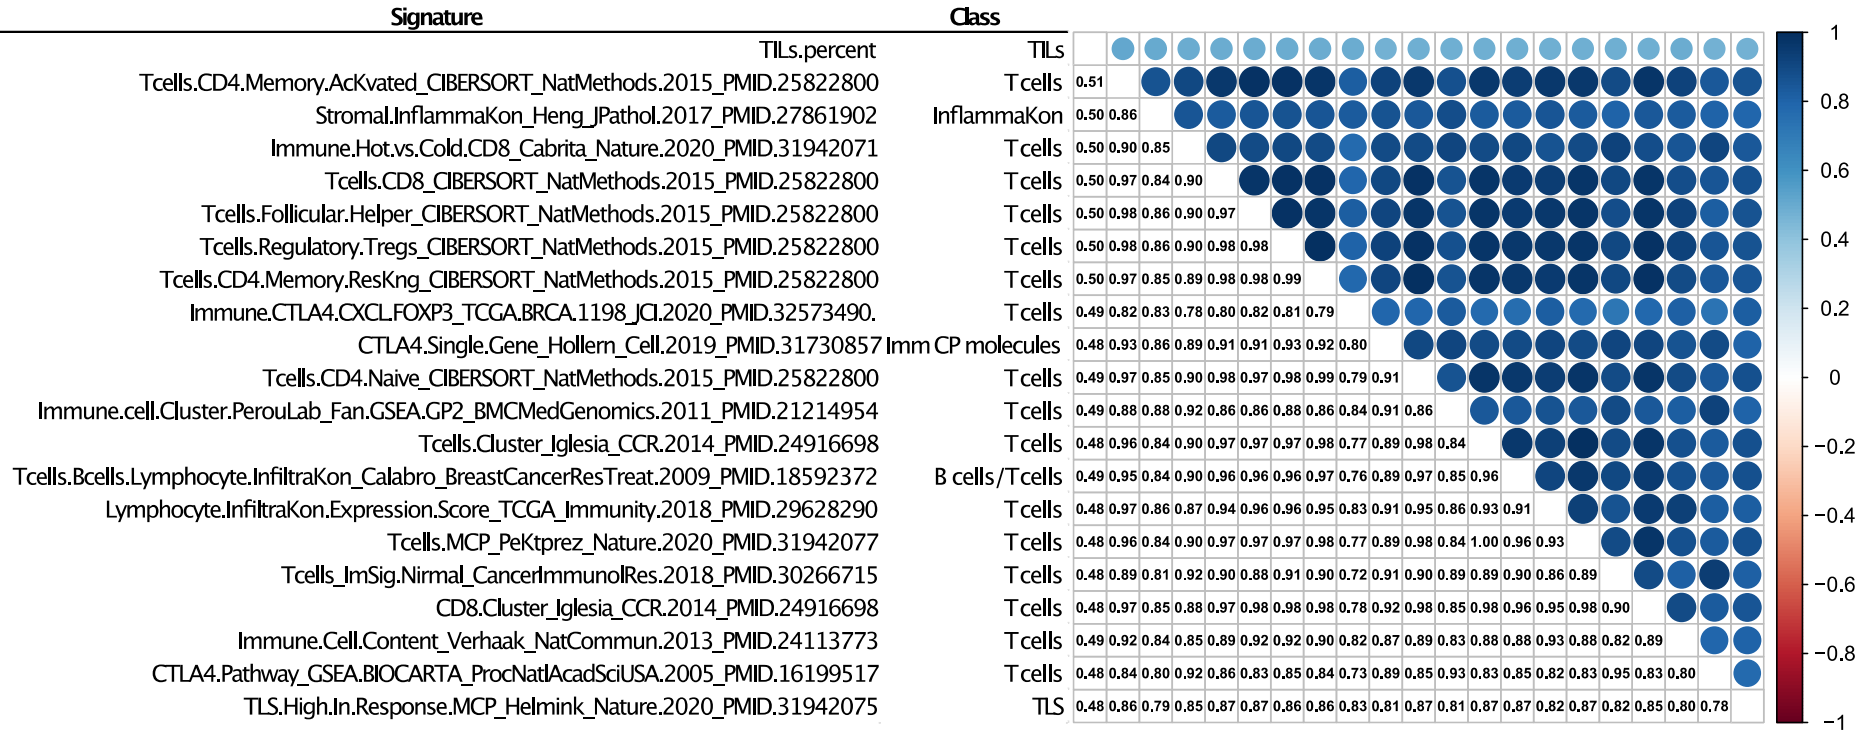

**Supplemental Table 1.** List and classification of immune gene expression signatures.

| <b>Signature_ID_paper</b>                                              | <b>Immune_Class</b> | <b>Signature type</b> | <b>PMID</b>   |
|------------------------------------------------------------------------|---------------------|-----------------------|---------------|
| Bcells.Cluster_Iglesia_CCR.2014_PMIID.24916698                         | B cells             | Median signature      | PMID.24916698 |
| Bcells.IL10.Minus_Lin_JImmunol.2014_PMIID.25080484                     | B cells             | Median signature      | PMID.25080484 |
| Bcells.IL10.Plus_Lin_JImmunol.2014_PMIID.25080484                      | B cells             | Median signature      | PMID.25080484 |
| Bcells.Centroblast_Dybaer_JCO.2015_PMIID.25800755                      | B cells             | Median signature      | PMID.25800755 |
| Bcells.Centrocyte_Dybaer_JCO.2015_PMIID.25800755                       | B cells             | Median signature      | PMID.25800755 |
| Bcells.Memory_Dybaer_JCO.2015_PMIID.25800755                           | B cells             | Median signature      | PMID.25800755 |
| Bcells.Naive_Dybaer_JCO.2015_PMIID.25800755                            | B cells             | Median signature      | PMID.25800755 |
| Bcells.Memory_CIBERSORT_NatMethods.2015_PMIID.25822800                 | B cells             | Median signature      | PMID.25822800 |
| Bcells.Naive_CIBERSORT_NatMethods.2015_PMIID.25822800                  | B cells             | Median signature      | PMID.25822800 |
| Bcells_Garber_CellMolGastroenterolHepatol.2017_PMIID.28508029          | B cells             | Median signature      | PMID.28508029 |
| Bcells.Extended_Garber_CellMolGastroenterolHepatol.2017_PMIID.28508029 | B cells             | Median signature      | PMID.28508029 |
| Bcells_Bindea_Immunity.2013_PMIID.24138885                             | B cells             | Median signature      | PMID.24138885 |
| Bcells.ImmuneProfiles.Mouse.Human_Shay_PNAS.2013_PMIID.23382184        | B cells             | Median signature      | PMID.23382184 |
| Bcells.Activated_Charoentong_CellRep.2017_PMIID.28052254               | B cells             | Median signature      | PMID.28052254 |
| Bcells.Immature_Charoentong_CellRep.2017_PMIID.28052254                | B cells             | Median signature      | PMID.28052254 |
| Bcells.Memory_Charoentong_CellRep.2017_PMIID.28052254                  | B cells             | Median signature      | PMID.28052254 |
| Bcells_ImSig.Nirmal_CancerImmunolRes.2018_PMIID.30266715               | B cells             | Median signature      | PMID.30266715 |
| Bcells.Plasma.cells.52genes_Miller_GenomeBiol.2013_PMIID.23618380      | B cells             | Median signature      | PMID.23618380 |
| Immune.CD19_TCGA.BRCA.1198_JCI.2020_PMIID.32573490                     | B cells             | Median signature      | PMID.32573490 |

| <b>Signature_ID_paper</b>                                                              | <b>Immune_Class</b> | <b>Signature type</b> | <b>PMID</b>   |
|----------------------------------------------------------------------------------------|---------------------|-----------------------|---------------|
| Immune1_TCGA.BRCA.1198_JCI.2020_PMIID.32573490                                         | B cells             | Median signature      | PMID.32573490 |
| Bcells.Tcells.Cooperation_Hollern_Cell.2019_PMIID.31730857                             | B cells/T cells     | Median signature      | PMID.31730857 |
| Immune.14_Perez_JCO.2015_PMIID.2560586                                                 | B cells/T cells     | Median signature      | PMID.25605861 |
| Tcells.Bcells.Lymphocyte.Infiltration_Calabro_BreastCancerResTreat.2009_PMIID.18592372 | B cells/T cells     | Median signature      | PMID.18592372 |
| Immune.CD4.CD53.CD84.BTK_TCGA.BRCA.1198_JCI.2020_PMIID.32573490                        | B cells/T cells     | Median signature      | PMID.32573490 |
| CD103.Negative_Broz_CancerCell.2014_PMIID.25446897                                     | Dendritic cells     | Median signature      | PMID.25446897 |
| Dendritic.cells.Activated_CIBERSORT_NatMethods.2015_PMIID.25822800                     | Dendritic cells     | Median signature      | PMID.25822800 |
| Dendritic.cells.Resting_CIBERSORT_NatMethods.2015_PMIID.25822800                       | Dendritic cells     | Median signature      | PMID.25822800 |
| Dendritic.cells.Activated_Bindea_Immunity.2013_PMIID.24138885                          | Dendritic cells     | Median signature      | PMID.24138885 |
| Dendritic.cells_Bindea_Immunity.2013_PMIID.24138885                                    | Dendritic cells     | Median signature      | PMID.24138885 |
| Dendritic.cells.ImmuneProfiles.Mouse.Human_Shay_PNAS.2013_PMIID.23382184               | Dendritic cells     | Median signature      | PMID.23382184 |
| Dendritic.cells.Activated_Charoentong_CellRep.2017_PMIID.28052254                      | Dendritic cells     | Median signature      | PMID.28052254 |
| Dendritic.cells.Immature._Charoentong_CellRep.2017_PMIID.28052254                      | Dendritic cells     | Median signature      | PMID.28052254 |
| Dendritic.cells.Immature._Bindea_Immunity.2013_PMIID.24138885                          | Dendritic cells     | Median signature      | PMID.24138885 |
| Plasmacytoid.Dendritic.cell_Charoentong_CellRep.2017_PMIID.28052254                    | Dendritic cells     | Median signature      | PMID.28052254 |
| Eosinophils_CIBERSORT_NatMethods.2015_PMIID.25822800                                   | Eosinophils         | Median signature      | PMID.25822800 |
| Eosinophils_Bindea_Immunity.2013_PMIID.24138885                                        | Eosinophils         | Median signature      | PMID.24138885 |
| Eosinophils_Charoentong_CellRep.2017_PMIID.28052254                                    | Eosinophils         | Median signature      | PMID.28052254 |
| Hematopoietic.Stem.cells.ImmuneProfiles.Mouse.Human_Shay_PNAS.2013_PMIID.23382184      | Hematopoietic       | Median signature      | PMID.23382184 |
| Immune.HLA.A.F_TCGA.BRCA.1198_JCI.2020_PMIID.32573490                                  | HLA                 | Median signature      | PMID.32573490 |
| Immune.HLA.D_TCGA.BRCA.1198_JCI.2020_PMIID.32573490                                    | HLA                 | Median signature      | PMID.32573490 |
| IFNa.Module10_Gatza_ProcNatlAcadSciUSA.2010_PMIID.20335537                             | IFN                 | Median signature      | PMID.20335537 |
| IFNg.Module11_Gatza_ProcNatlAcadSciUSA.2010_PMIID.20335537                             | IFN                 | Median signature      | PMID.20335537 |

| <b>Signature_ID_paper</b>                                     | <b>Immune_Class</b>         | <b>Signature type</b> | <b>PMID</b>   |
|---------------------------------------------------------------|-----------------------------|-----------------------|---------------|
| IFN.Cluster.GSEA.GP11_Fan_BMCMedGenomics.2011_PMIID.21214954  | IFN                         | Median signature      | PMID.21214954 |
| IFN_Rody_BreastCancerResearch.2008_PMIID.19272155             | IFN                         | Median signature      | PMID.19272155 |
| IFN.Cluster_Fan_BMCMedGenomics.2011_PMIID.21214954            | IFN                         | Median signature      | PMID.21214954 |
| IFN.3.ImmLandscape_Wolf_PlosOne.2014_PMIID.24516633           | IFN                         | Median signature      | PMID.24516633 |
| IFN.5.ImmLandscape_Wolf_PlosOne.2014_PMIID.24516633           | IFN                         | Median signature      | PMID.24516633 |
| IFN.Pathway_ImSig.Nirmal_CancerImmunolRes.2018_PMIID.30266715 | IFN                         | Median signature      | PMID.30266715 |
| IFN.Score.module3_TCGA_Immunity.2018_PMIID.29628290           | IFN                         | Median signature      | PMID.29628290 |
| Immune.IFN_TCGA.BRCA.1198_JCI.2020_PMIID.32573490             | IFN                         | Median signature      | PMID.32573490 |
| IgG_Rody_BreastCancerResearch.2008_PMIID.19272155             | Ig                          | Median signature      | PMID.19272155 |
| IGG.Cluster_Fan_BMCMedGenomics.2011_PMIID.21214954            | Ig                          | Median signature      | PMID.21214954 |
| Ig_TCGA.BRCA.1198_Cell.2015_PMIID.26451490                    | Ig                          | Median signature      | PMID.26451490 |
| Immune.Suppression_Kardos_JCIInsight.2016_PMIID.27699256      | Immune checkpoint molecules | Median signature      | PMID.27699256 |
| CD274.Single.Gene_Hollern_Cell.2019_PMIID.31730857            | Immune checkpoint molecules | Single gene           | PMID.31730857 |
| CTLA4.Single.Gene_Hollern_Cell.2019_PMIID.31730857            | Immune checkpoint molecules | Single Gene           | PMID.31730857 |
| PDCD1.Single.Gene_Pare_AnnOncol.2019_PMIID.30165419           | Immune checkpoint molecules | Single Gene           | PMID.30165419 |
| Immunosuppression_Petitprez_Nature.2020_PMIID.31942077        | Immune suppression          | Median signature      | PMID.31942077 |
| Stromal.Inflammation_Heng_JPathol.2017_PMIID.27861902         | Inflammation                | Median signature      | PMID.27861902 |
| Wound.Healing_Chang_PlosBiol.2004_PMIID.14737219              | Inflammation                | Median signature      | PMID.14737219 |
| TGFB.score_TCGA_Immunity.2018_PMIID.29628290                  | Inflammation                | Median signature      | PMID.29628290 |
| Immune.FOS.JUN.IL6_TCGA.BRCA.1198_JCI.2020_PMIID.32573490     | Inflammation                | Median signature      | PMID.32573490 |
| Macrophages.M0_CIBERSORT_NatMethods.2015_PMIID.25822800       | Macrophages                 | Median signature      | PMID.25822800 |
| Macrophages.M1_CIBERSORT_NatMethods.2015_PMIID.25822800       | Macrophages                 | Median signature      | PMID.25822800 |

| <b>Signature_ID_paper</b>                                            | <b>Immune_Class</b> | <b>Signature type</b> | <b>PMID</b>   |
|----------------------------------------------------------------------|---------------------|-----------------------|---------------|
| Macrophages.M2_CIBERSORT_NatMethods.2015_PMIID.25822800              | Macrophages         | Median signature      | PMID.25822800 |
| Macrophages_Bindea_Immunity.2013_PMIID.24138885                      | Macrophages         | Median signature      | PMID.24138885 |
| Macrophages.M2_Ghassabeh_Blood.2006_PMIID.16556895                   | Macrophages         | Median signature      | PMID.16556895 |
| Macrophages.Th1.Cluster_Iglesia_CCR.2014_PMIID.24916698              | Macrophages         | Median signature      | PMID.24916698 |
| Macrophages.ImmuneProfiles.Mouse.Human_Shay_PNAS.2013_PMIID.23382184 | Macrophages         | Median signature      | PMID.23382184 |
| Macrophages_Charoentong_CellRep.2017_PMIID.28052254                  | Macrophages         | Median signature      | PMID.28052254 |
| Macrophages.Monocytes.CSF1.Response_Beck_CCR.2009_PMIID.19188147     | Macrophages         | Median signature      | PMID.19188147 |
| Macrophages_ImSig.Nirmal_CancerImmunolRes.2018_PMIID.30266715        | Macrophages         | Median signature      | PMID.30266715 |
| Immune.GIMAP.IL16_TCGA.BRCA.1198_JCI.2020_PMIID.32573490             | Macrophages         | Median signature      | PMID.32573490 |
| Mast.cells.Activated_CIBERSORT_NatMethods.2015_PMIID.25822800        | Mastocytes          | Median signature      | PMID.25822800 |
| Mast.cells.Resting_CIBERSORT_NatMethods.2015_PMIID.25822800          | Mastocytes          | Median signature      | PMID.25822800 |
| Mast.cells_Bindea_Immunity.2013_PMIID.24138885                       | Mastocytes          | Median signature      | PMID.24138885 |
| Mast.cell_Charoentong_CellRep.2017_PMIID.28052254                    | Mastocytes          | Median signature      | PMID.28052254 |
| MDSC.Granulocytic_Youn_LeukocBiol.2012_PMIID.21954284                | MDSC                | Median signature      | PMID.21954284 |
| MDSC.Neutrophil_Youn_LeukocBiol.2012_PMIID.21954284                  | MDSC                | Median signature      | PMID.21954284 |
| MDSC.Tumor.Macrophages_Schlecker_JImmunol.2012_PMIID.23152559        | MDSC                | Median signature      | PMID.23152559 |
| MDSC.Tumor_Schlecker_JImmunol.2012_PMIID.23152559                    | MDSC                | Median signature      | PMID.23152559 |
| MDSC_Charoentong_CellRep.2017_PMIID.28052254                         | MDSC                | Median signature      | PMID.28052254 |
| MHC.11genes_Forero_CancerImmunolRes.2016_PMIID.26980599              | MHC                 | Median signature      | PMID.26980599 |
| MHC.24genes_Forero_CancerImmunolRes.2016_PMIID.26980599              | MHC                 | Median signature      | PMID.26980599 |
| MHC.I_Rody_BreastCancerResearch.2008_PMIID.19272155                  | MHC                 | Median signature      | PMID.19272155 |
| MHC.II_Rody_BreastCancerResearch.2008_PMIID.19272155                 | MHC                 | Median signature      | PMID.19272155 |
| MHC.I.CoreGenes_Lauss_NatCommun.2017_PMIID29170503                   | MHC                 | Median signature      | PMID.29170503 |
| CD68.Cluster_Iglesia_CCR.2014_PMIID.24916698                         | Monocytes           | Median signature      | PMID.24916698 |

| <b>Signature_ID_paper</b>                                               | <b>Immune_Class</b> | <b>Signature type</b> | <b>PMID</b>   |
|-------------------------------------------------------------------------|---------------------|-----------------------|---------------|
| Monocytes_CIBERSORT_NatMethods.2015_PMIID.25822800                      | Monocytes           | Median signature      | PMID.25822800 |
| Tcells.Effector.Memory_Bindea_Immunity.2013_PMIID.24138885              | Monocytes           | Median signature      | PMID.24138885 |
| Monocytes.Dendritic.cell.Metagene_Miller_GenomeBiol.2013_PMIID.23618380 | Monocytes           | Median signature      | PMID.23618380 |
| Monocytes_Charoentong_CellRep.2017_PMIID.28052254                       | Monocytes           | Median signature      | PMID.28052254 |
| Monocytes_ImSig.Nirmal_CancerImmunolRes.2018_PMIID.30266715             | Monocytes           | Median signature      | PMID.30266715 |
| Monocytes.Dendritic.25genes_Miller_GenomeBiol.2013_PMIID.23618380       | Monocytes           | Median signature      | PMID.23618380 |
| CSF1.Response_TCGA_Immunity.2018_PMIID.29628290                         | Monocytes           | Median signature      | PMID.29628290 |
| Immune.CD34.TIE1_TCGA.BRCA.1198_JCI.2020_PMIID.32573490                 | Monocytes           | Median signature      | PMID.32573490 |
| HCK_Rody_BreastCancerResearch.2008_PMIID.19272155                       | Monocytes           | Median signature      | PMID.19272155 |
| Influenza.11genes_Khatri_Immunity.2015_PMIID.26682989                   | Monocytes           | Median signature      | PMID.26682989 |
| Neutrophils.Activated.Blood_Janiszevska_NatCellBiol.2019_PMIID.31263265 | Neutrophils         | Median signature      | PMID.31263265 |
| Neutrophils.Activated.Lung_Janiszevska_NatCellBiol.2019_PMIID.31263265  | Neutrophils         | Median signature      | PMID.31263265 |
| Neutrophils_CIBERSORT_NatMethods.2015_PMIID.25822800                    | Neutrophils         | Median signature      | PMID.25822800 |
| Neutrophils_Bindea_Immunity.2013_PMIID.24138885                         | Neutrophils         | Median signature      | PMID.24138885 |
| Granulocytes.ImmuneProfiles.Mouse.Human_Shay_PNAS.2013_PMIID.23382184   | Neutrophils         | Median signature      | PMID.23382184 |
| Neutrophils.MCP_Petitprez_Nature.2020_PMIID.31942077                    | Neutrophils         | Median signature      | PMID.31942077 |
| Neutrophils_Charoentong_CellRep.2017_PMIID.28052254                     | Neutrophils         | Median signature      | PMID.28052254 |
| Neutrophils_ImSig.Nirmal_CancerImmunolRes.2018_PMIID.30266715           | Neutrophils         | Median signature      | PMID.30266715 |
| NK.Activated_CIBERSORT_NatMethods.2015_PMIID.25822800                   | NK cells            | Median signature      | PMID.25822800 |
| NK.Resting_CIBERSORT_NatMethods.2015_PMIID.25822800                     | NK cells            | Median signature      | PMID.25822800 |
| NK.CD56bright_Bindea_Immunity.2013_PMIID.24138885                       | NK cells            | Median signature      | PMID.24138885 |
| NK.CD56dim_Bindea_Immunity.2013_PMIID.24138885                          | NK cells            | Median signature      | PMID.24138885 |
| NK_Bindea_Immunity.2013_PMIID.24138885                                  | NK cells            | Median signature      | PMID.24138885 |
| Tcells.Central.Memory_Bindea_Immunity.2013_PMIID.24138885               | NK cells            | Median signature      | PMID.24138885 |

| <b>Signature_ID_paper</b>                                               | <b>Immune_Class</b> | <b>Signature type</b> | <b>PMID</b>   |
|-------------------------------------------------------------------------|---------------------|-----------------------|---------------|
| NK.ImmuneProfiles.Mouse.Human_Shay_PNAS.2013_PMIID.23382184             | NK cells            | Median signature      | PMID.23382184 |
| NK.CD56bright_Charoentong_CellRep.2017_PMIID.28052254                   | NK cells            | Median signature      | PMID.28052254 |
| NK.CD56dim_Charoentong_CellRep.2017_PMIID.28052254                      | NK cells            | Median signature      | PMID.28052254 |
| NK_Charoentong_CellRep.2017_PMIID.28052254                              | NK cells            | Median signature      | PMID.28052254 |
| NK.Tcell_Charoentong_CellRep.2017_PMIID.28052254                        | NK cells            | Median signature      | PMID.28052254 |
| NK_ImSig.Nirmal_CancerImmunolRes.2018_PMIID.30266715                    | NK cells            | Median signature      | PMID.30266715 |
| NK.MCP_Helmink_Nature.2020_PMIID.31942077                               | NK cells            | Median signature      | PMID.31942077 |
| Bcells.Plasmablast_Dybaer_JCO.2015_PMIID.25800755                       | Plasma cells        | Median signature      | PMID.25800755 |
| Plasma.cells_CIBERSORT_NatMethods.2015_PMIID.25822800                   | Plasma cells        | Median signature      | PMID.25822800 |
| Bcells.Plasma.cells.Metagene_Miller_GenomeBiol.2013_PMIID.23618380      | Plasma cells        | Median signature      | PMID.23618380 |
| Plasma.cells_ImSig.Nirmal_CancerImmunolRes.2018_PMIID.30266715          | Plasma cells        | Median signature      | PMID.30266715 |
| STAT1_Rody_BreastCancerResearch.2008_PMIID.19272155                     | STAT                | Median signature      | PMID.19272155 |
| Proliferation.Pathway_ImSig.Nirmal_CancerImmunolRes.2018_PMIID.30266715 | T cells             | Median signature      | PMID.30266715 |
| Immune.CTLA4.CXCL.FOXP3_TCGA.BRCA.1198_JCI.2020_PMIID.32573490.         | T cells             | Median signature      | PMID.32573490 |
| CD8.Cluster_Iglesia_CCR.2014_PMIID.24916698                             | T cells             | Median signature      | PMID.24916698 |
| Tcells.CD8.MCP_Petitprez_Nature.2020_PMIID.31942077                     | T cells             | Median signature      | PMID.31942077 |
| Tcells.CD4.Memory.Activated_CIBERSORT_NatMethods.2015_PMIID.25822800    | T cells             | Median signature      | PMID.25822800 |
| Tcells.CD4.Memory.Resting_CIBERSORT_NatMethods.2015_PMIID.25822800      | T cells             | Median signature      | PMID.25822800 |
| Tcells.CD4.Naive_CIBERSORT_NatMethods.2015_PMIID.25822800               | T cells             | Median signature      | PMID.25822800 |
| Tcells.CD8_CIBERSORT_NatMethods.2015_PMIID.25822800                     | T cells             | Median signature      | PMID.25822800 |
| Tcells.Follicular.Helper_CIBERSORT_NatMethods.2015_PMIID.25822800       | T cells             | Median signature      | PMID.25822800 |
| Tcells.Gamma.Delta_CIBERSORT_NatMethods.2015_PMIID.25822800             | T cells             | Median signature      | PMID.25822800 |
| Tcells.Regulatory.Tregs_CIBERSORT_NatMethods.2015_PMIID.25822800        | T cells             | Median signature      | PMID.25822800 |
| Cytolytic.Activity_Rooney_Cell.2015_PMIID.25594174                      | T cells             | Median signature      | PMID.25594174 |

| <b>Signature_ID_paper</b>                                                                   | <b>Immune_Class</b> | <b>Signature type</b> | <b>PMID</b>   |
|---------------------------------------------------------------------------------------------|---------------------|-----------------------|---------------|
| Cytotoxic.Lymphocytes.MCP_Petitprez_Nature.2020_PMID.31942077                               | T cells             | Median signature      | PMID.31942077 |
| Immune.Active_Hollern_Cell.2019_PMID.31730857                                               | T cells             | Median signature      | PMID.31730857 |
| CTLA4.Pathway_GSEA.BIOCARTA_ProcNatlAcadSciUSA.2005_PMID.16199517                           | T cells             | Median signature      | PMID.16199517 |
| Immune.cell.Cluster.PerouLab_Fan.GSEA.GP2_BMCMedGenomics.2011_PMID.21214954                 | T cells             | Median signature      | PMID.16199517 |
| Tcells.Bcell.KEGG.hematopoietic.cell.lineage_GSEA.GP2_ProcNatlAcadSciUSA.2005_PMID.16199517 | T cells             | Median signature      | PMID.16199517 |
| PD1.Signaling.Reactome_GSEA_ProcNatlAcadSciUSA.2005_PMID.16199517                           | T cells             | Median signature      | PMID.16199517 |
| Tcells.CD8_Bindea_Immunity.2013_PMID.24138885                                               | T cells             | Median signature      | PMID.24138885 |
| Cytotoxic.cells_Bindea_Immunity.2013_PMID.24138885                                          | T cells             | Median signature      | PMID.24138885 |
| Tcells_Bindea_Immunity.2013_PMID.24138885                                                   | T cells             | Median signature      | PMID.24138885 |
| Tcells.Thelper_Bindea_Immunity.2013_PMID.24138885                                           | T cells             | Median signature      | PMID.24138885 |
| Tcells.Follicular.Helper_Bindea_Immunity.2013_PMID.24138885                                 | T cells             | Median signature      | PMID.24138885 |
| Tcells.Gamma.Delta_Bindea_Immunity.2013_PMID.24138885                                       | T cells             | Median signature      | PMID.24138885 |
| Tcells.Th1.cells_Bindea_Immunity.2013_PMID.24138885                                         | T cells             | Median signature      | PMID.24138885 |
| Tcells.Th17.cells_Bindea_Immunity.2013_PMID.24138885                                        | T cells             | Median signature      | PMID.24138885 |
| Tcells.Th2.cells_Bindea_Immunity.2013_PMID.24138885                                         | T cells             | Median signature      | PMID.24138885 |
| Immune.Hot.vs.Cold.CD8_Cabrita_Nature.2020_PMID.31942071                                    | T cells             | Median signature      | PMID.31942071 |
| Immune.87_Perez_JCO.2015_PMID.2560586                                                       | T cells             | Median signature      | PMID.2560586  |
| LCK_Rody_BreastCancerResearch.2008_PMID.19272155                                            | T cells             | Median signature      | PMID.19272155 |
| MCD3.CD8_Fan_BMCMedGenomics.2011_PMID.21214954                                              | T cells             | Median signature      | PMID.21214954 |
| MERCK.Immune.Signature_Cristescu_Science.2018_PMID.30309915                                 | T cells             | Median signature      | PMID.30309915 |
| Tcells.NK.Metagene_Miller_GenomeBiol.2013_PMID.23618380                                     | T cells             | Median signature      | PMID.23618380 |
| Tcells.ImmuneProfiles.Mouse.Human_Shay_PNAS.2013_PMID.23382184                              | T cells             | Median signature      | PMID.23382184 |
| Tcells.CD4.Activated_Charoentong_CellRep.2017_PMID.28052254                                 | T cells             | Median signature      | PMID.28052254 |



| <b>Signature_ID_paper</b>                                                               | <b>Immune_Class</b> | <b>Signature type</b> | <b>PMID</b>   |
|-----------------------------------------------------------------------------------------|---------------------|-----------------------|---------------|
| Tcells.CD8.Activated_Charoentong_CellRep.2017_PMIID.28052254                            | T cells             | Median signature      | PMID.28052254 |
| Tcells.CD4.Central.Memory_Charoentong_CellRep.2017_PMIID.28052254                       | T cells             | Median signature      | PMID.28052254 |
| Tcells.CD8.Central.Memory_Charoentong_CellRep.2017_PMIID.28052254                       | T cells             | Median signature      | PMID.28052254 |
| Tcells.CD4.Effector.Memory_Charoentong_CellRep.2017_PMIID.28052254                      | T cells             | Median signature      | PMID.28052254 |
| Tcells.CD8.Effector.Memory_Charoentong_CellRep.2017_PMIID.28052254                      | T cells             | Median signature      | PMID.28052254 |
| Tcells.Gamma.Delta_Charoentong_CellRep.2017_PMIID.28052254                              | T cells             | Median signature      | PMID.28052254 |
| Tcells.Regulatory_Charoentong_CellRep.2017_PMIID.28052254                               | T cells             | Median signature      | PMID.28052254 |
| Tcells.Follicular.Helper_Charoentong_CellRep.2017_PMIID.28052254                        | T cells             | Median signature      | PMID.28052254 |
| Tcells.Th1.cells_Charoentong_CellRep.2017_PMIID.28052254                                | T cells             | Median signature      | PMID.28052254 |
| Tcells.Th17.cells_Charoentong_CellRep.2017_PMIID.28052254                               | T cells             | Median signature      | PMID.28052254 |
| Tcells.Th2_Charoentong_CellRep.2017_PMIID.28052254                                      | T cells             | Median signature      | PMID.28052254 |
| Tcells_ImSig.Nirmal_CancerImmunolRes.2018_PMIID.30266715                                | T cells             | Median signature      | PMID.30266715 |
| Tcells.NK.51genes_Miller_GenomeBiol.2013_PMIID.23618380                                 | T cells             | Median signature      | PMID.23618380 |
| Tcells.CD8.Effector.vs.Naive.2_Pauken_Science.2016_PMIID.27789795                       | T cells             | Median signature      | PMID.27789795 |
| Tcells.CD8.Exhausted.vs.AntiPDL1.2_Pauken_Science.2016_PMIID.27789795                   | T cells             | Median signature      | PMID.27789795 |
| Tcells.CD8.Exhausted.vs.Naive.2_Pauken_Science.2016_PMIID.27789795                      | T cells             | Median signature      | PMID.27789795 |
| Tcells.CD8.Memory.vs.Naive.1_Pauken_Science.2016_PMIID.27789795                         | T cells             | Median signature      | PMID.27789795 |
| Tcells.Activation_Petitprez_Nature.2020_PMIID.31942077                                  | T cells             | Median signature      | PMID.31942077 |
| Tcells.Cluster_Iglesia_CCR.2014_PMIID.24916698                                          | T cells             | Median signature      | PMID.24916698 |
| Tcells.Survival.2gene_Petitprez_Nature.2020_PMIID.31942077                              | T cells             | Median signature      | PMID.31942077 |
| Tcells.Regulatory.cell.2gene_Petitprez_Nature.2020_PMIID.31942077                       | T cells             | Median signature      | PMID.31942077 |
| Tcells.Resident.Memory.Single.cell_Savas_NatMed.2018_PMIID.29942092                     | T cells             | Median signature      | PMID.29942092 |
| Tcells.MCP_Petitprez_Nature.2020_PMIID.31942077                                         | T cells             | Median signature      | PMID.31942077 |
| Tcells.CD8.Exhausted.Anti.PDL1.vs.Control.Metagene.1_Pauken_Science.2016_PMIID.27789795 | T cells             | Median signature      | PMID.27789795 |

| <b>Signature_ID_paper</b>                                                                    | <b>Immune_Class</b> | <b>Signature type</b> | <b>PMID</b>   |
|----------------------------------------------------------------------------------------------|---------------------|-----------------------|---------------|
| Tcells.CD8.Exhausted.at.day.8.post.Imm.vs.Naive.Metagene.1_Pauken_Science.2016_PMID.27789795 | T cells             | Median signature      | PMID.27789795 |
| Tcells.CD8.Exhausted.vs.Naive.Metagene.1_Pauken_Science.2016_PMID.27789795                   | T cells             | Median signature      | PMID.27789795 |
| Tcells.CD8.Exhausted.vs.Naive.Metagene.3_Pauken_Science.2016_PMID.27789795                   | T cells             | Median signature      | PMID.27789795 |
| Tcells.CD8.Memory.vs.Naive.Metagene.1_Pauken_Science.2016_PMID.27789795                      | T cells             | Median signature      | PMID.27789795 |
| Tcells.CD8.Memory.vs.Naive.Metagene.2_Pauken_Science.2016_PMID.27789795                      | T cells             | Median signature      | PMID.27789795 |
| Tcells.CD8.Memory.vs.Naive.Metagene.3_Pauken_Science.2016_PMID.27789795                      | T cells             | Median signature      | PMID.27789795 |
| Serum.Response.Up_TCGA_Immunity.2018_PMID.29628290                                           | T cells             | Median signature      | PMID.29628290 |
| Lymphocyte.Infiltration.Expression.Score_TCGA_Immunity.2018_PMID.29628290                    | T cells             | Median signature      | PMID.29628290 |
| Tcells.Follicular.Helper_TCGA_Immunity.2018_PMID.29628290                                    | T cells             | Median signature      | PMID.29628290 |
| Tcells.Gamma.Delta_TCGA_Immunity.2018_PMID.29628290                                          | T cells             | Median signature      | PMID.29628290 |
| Immune.CD8.GZMK_TCGA.BRCA.1198_JCI.2020_PMID.32573490                                        | T cells             | Median signature      | PMID.32573490 |
| Immune.Cell.Content_Verhaak_NatCommun.2013_PMID.24113773                                     | T cells             | Median signature      | PMID.24113773 |
| TLS.Hallmark_Cabrita_Nature.2020_PMID.31942071                                               | TLS                 | Median signature      | PMID.31942071 |
| TLS.Known.Markers_Cabrita_Nature.2020_PMID.31942071                                          | TLS                 | Median signature      | PMID.31942071 |
| TLS.12genes.Chemokine_Zhu_FrontImmunol.2017_PMID.28713385                                    | TLS                 | Median signature      | PMID.28713385 |
| TLS.High.In.No.Response_Helmink_Nature.2020_PMID.31942075                                    | TLS                 | Median signature      | PMID.31942075 |
| TLS.High.In.Response.MCP_Helmink_Nature.2020_PMID.31942075                                   | TLS                 | Median signature      | PMID.31942075 |
| TLS.9genes_Cabrita_Nature.2020_PMID.31942071                                                 | TLS                 | Median signature      | PMID.31942071 |
| TLS.Tumors.w.TLS.and.CD8.vs.CD8.alone_Cabrita_Nature.2020_PMID.31942071                      | TLS                 | Median signature      | PMID.31942071 |

**Supplemental Table 2.** List of non-immune gene expression signatures.

| <b>Signature_ID_paper</b>                                                                    | <b>Signature type</b> | <b>PMID</b>   |
|----------------------------------------------------------------------------------------------|-----------------------|---------------|
| HouseKeeping_Genome.Biol.2004_Pmid.15287981                                                  | Median signature      | PMID.15287981 |
| GATA3.induced.genes_Oncogene.2004_Pmid.15361840                                              | Median signature      | PMID.15361840 |
| MCF7.E2.induced.genes_JCO.2006_Pmid.16505416                                                 | Median signature      | PMID.16505416 |
| GATA3.induced.genes_JCO.2006_Pmid.16505416                                                   | Median signature      | PMID.16505416 |
| MCF7.E2.repressed.genes_JCO.2006_Pmid.16505416                                               | Median signature      | PMID.16505416 |
| CIN70_Nat.Genet.2006_Pmid.16921376                                                           | Median signature      | PMID.16921376 |
| RB_LOSS_J.Clin.Invest.2007_Pmid.17160137                                                     | Median signature      | PMID.17160137 |
| Shipitsin_CD44_A_Cancer.Cell.2007_Pmid.17349583                                              | Median signature      | PMID.17349583 |
| Shipitsin_CD44_B_Cancer.Cell.2007_Pmid.17349583                                              | Median signature      | PMID.17349583 |
| KRAS_amplicon_Genome.Biology.2007_Pmid.17493263                                              | Median signature      | PMID.17493263 |
| Claudin_High_Genome.Biol.2007_Pmid.17493263                                                  | Median signature      | PMID.17493263 |
| MM_p53null_1pFDR_UP_Genome.Biology.2007_Pmid.17493263                                        | Median signature      | PMID.17493263 |
| Claudin_Low_Genome.Biol.2007_Pmid.17493263                                                   | Median signature      | PMID.17493263 |
| MM_DMBAwnt_1pFDR_UP_Genome.Biology.2007_Pmid.17493263                                        | Median signature      | PMID.17493263 |
| GSEA_GP5_MYC_targets_TERT.r=0.922_PerouLab_MM_Myc_1pFDR_UP_Genome_Biology_2007_Pmid.17493263 | Median signature      | PMID.17493263 |
| MM_NeuPyMT_1pFDR_UP_Genome.Biology.2007_Pmid.17493263                                        | Median signature      | PMID.17493263 |
| MM_C3Tag_1pFDR_UP_Genome.Biology.2007_Pmid.17493263                                          | Median signature      | PMID.17493263 |
| MM_WapINT3_1pFDR_UP_Genome.Biology.2007_Pmid.17493263                                        | Median signature      | PMID.17493263 |
| MM_BRCAwnt_1pFDR_UP_Genome.Biology.2007_Pmid.17493263                                        | Median signature      | PMID.17493263 |
| MM_WAPTag_1pFDR_UP_Genome.Biology.2007_Pmid.17493263                                         | Median signature      | PMID.17493263 |

| <b>Signature_ID_paper</b>                                    | <b>Signature type</b> | <b>PMID</b>   |
|--------------------------------------------------------------|-----------------------|---------------|
| MM_Potluck_1pFDR_UP_Genome.Biology.2007_PMIID.17493263       | Median signature      | PMID.17493263 |
| MM_Normal_1pFDR_UP_Genome.Biology.2007_PMIID.17493263        | Median signature      | PMID.17493263 |
| HER1_Cluster2_BMC.Genomics.2007_PMIID.17663798               | Median signature      | PMID.17663798 |
| HER1_Cluster1_BMC.Genomics.2007_PMIID.17663798               | Median signature      | PMID.17663798 |
| HER1_Cluster3_BMC.Genomics.2007_PMIID.17663798               | Median signature      | PMID.17663798 |
| Fibromatosis_Lab.Invest.2008_PMIID.18414401                  | Median signature      | PMID.18414401 |
| Murat_G24_J.Clin.Oncol.2008_PMIID.18565887                   | Median signature      | PMID.18565887 |
| Murat_G18_J.Clin.Oncol.2008_PMIID.18565887                   | Median signature      | PMID.18565887 |
| Murat_G07_J.Clin.Oncol.2008_PMIID.18565887                   | Median signature      | PMID.18565887 |
| Wirapati_Proliferation_Breast.Cancer.Res.2008_PMIID.18662380 | Median signature      | PMID.18662380 |
| RB_LOH_Breast.Cancer.Res.2008_PMIID.18782450                 | Median signature      | PMID.18782450 |
| bMYB_Signature_Oncogene.2009_PMIID.19043454                  | Median signature      | PMID.19043454 |
| Glycolysis_Signature_BMC.Med.2009_PMIID.19291283             | Median signature      | PMID.19291283 |
| VEGF_13genes_BMC.Med.2009_PMIID.19291283                     | Median signature      | PMID.19291283 |
| Claudin_Low_29_Cancer.Res.2009_PMIID.19435916                | Median signature      | PMID.19435916 |
| METAPLASTIC_Up_CanRes.2009_PMIID.19435916                    | Median signature      | PMID.19435916 |
| Lung.WNT.DiMeo_Cancer.Res.2009_PMIID.19549913                | Median signature      | PMID.19549913 |
| Luminal_Progenitor_Down_Nat.Med.2009_PMIID.19648928          | Median signature      | PMID.19648928 |
| Mature_LuminaUp_Nat.Med.2009_PMIID.19648928                  | Median signature      | PMID.19648928 |
| Mature_Luminal_Down_Nat.Med.2009_PMIID.19648928              | Median signature      | PMID.19648928 |
| Stromal_Up_Nat.Med.2009_PMIID.19648928                       | Median signature      | PMID.19648928 |
| MASC_Down_Nat.Med.2009_PMIID.19648928                        | Median signature      | PMID.19648928 |
| Stromal_Down_Nat.Med.2009_PMIID.19648928                     | Median signature      | PMID.19648928 |
| Luminal_Progenitor_Up_Nat.Med.2009_PMIID.19648928            | Median signature      | PMID.19648928 |
| MASC_Up_Nat.Med.2009_PMIID.19648928                          | Median signature      | PMID.19648928 |

| <b>Signature_ID_paper</b>                                           | <b>Signature type</b> | <b>PMID</b>   |
|---------------------------------------------------------------------|-----------------------|---------------|
| MS_CD44_UP_PNAS.2009_PMIID.19666588                                 | Median signature      | PMID.19666588 |
| MS_CD44_DOWN_PNAS.2009_PMIID.19666588                               | Median signature      | PMID.19666588 |
| Troester_Wound_Signature_Clin.Cancer.Res.2009_PMIID.19887484        | Median signature      | PMID.19887484 |
| Duke_Module17_pr_Mike_PMIID.20335537                                | Median signature      | PMID.20335537 |
| Duke_Module02_akt_Mike_PMIID.20335537                               | Median signature      | PMID.20335537 |
| Duke_Module05_egfr_Mike_PMIID.20335537                              | Median signature      | PMID.20335537 |
| Duke_Module09_hypoxia_Mike_PMIID.20335537                           | Median signature      | PMID.20335537 |
| Duke_Module22_tnfa_Mike_PMIID.20335537                              | Median signature      | PMID.20335537 |
| Duke_Module12_lacticacidosis_Mike_PMIID.20335537                    | Median signature      | PMID.20335537 |
| Duke_Module07_glucosedepletion_Mike_PMIID.20335537                  | Median signature      | PMID.20335537 |
| Duke_Module04_e2f1_Mike_PMIID.20335537                              | Median signature      | PMID.20335537 |
| Duke_Module16_pi3k_Mike_PMIID.20335537                              | Median signature      | PMID.20335537 |
| Duke_Module14_p53_Mike_PMIID.20335537                               | Median signature      | PMID.20335537 |
| Duke_Module06_er_Mike_PMIID.20335537                                | Median signature      | PMID.20335537 |
| Duke_Module15_p63_Mike_PMIID.20335537                               | Median signature      | PMID.20335537 |
| Duke_Module13_myc_Mike_PMIID.20335537                               | Median signature      | PMID.20335537 |
| Duke_Module19_src_Mike_PMIID.20335537                               | Median signature      | PMID.20335537 |
| Duke_Module03_betacatenin_Mike_PMIID.20335537                       | Median signature      | PMID.20335537 |
| Duke_Module01_acidosis_Mike_PMIID.20335537                          | Median signature      | PMID.20335537 |
| Duke_Module21_tgfb_Mike_PMIID.20335537                              | Median signature      | PMID.20335537 |
| Duke_Module08_her2_Mike_PMIID.20335537                              | Median signature      | PMID.20335537 |
| Lim.et.al.2010.Conserved.Mature_BCR.2010_PMIID.20346151             | Median signature      | PMID.20346151 |
| Lim.et.al.2010.Conserved.Luminal.Progenitor_BCR.2010_PMIID.20346151 | Median signature      | PMID.20346151 |
| Lim.et.al.2010.Conserved.aMaSC_BCR.2010_PMIID.20346151              | Median signature      | PMID.20346151 |
| EMT_DOWN_Weingberg_PNAS.2010_PMIID.20713713                         | Median signature      | PMID.20713713 |

| <b>Signature_ID_paper</b>                          | <b>Signature type</b> | <b>PMID</b>   |
|----------------------------------------------------|-----------------------|---------------|
| EMT_UP_Weinberg_PNAS.2010_PMIID.20713713           | Median signature      | PMID.20713713 |
| Taube_EMT_down_PNAS.2010_PMIID.20713713            | Median signature      | PMID.20713713 |
| Taube_EMT_up_PNAS.2010_PMIID.20713713              | Median signature      | PMID.20713713 |
| MDACC.FNA.1_J.Clin.Oncol.2010_PMIID.20805453       | Median signature      | PMID.20805453 |
| MDACC.FNA.2_J.Clin.Oncol.2010_PMIID.20805453       | Median signature      | PMID.20805453 |
| HRneg.Tneg_14.Genes_BCR.2010_PMIID.20946665        | Median signature      | PMID.20946665 |
| C_MYB_Signature_PLoS.One.2010_PMIID.20949095       | Median signature      | PMID.20949095 |
| MM_Red3_BMC.Med.Genomics.2011_PMIID.21214954       | Median signature      | PMID.21214954 |
| MM_Red5_BMC.Med.Genomics.2011_PMIID.21214954       | Median signature      | PMID.21214954 |
| MM_Red7_BMC.Med.Genomics.2011_PMIID.21214954       | Median signature      | PMID.21214954 |
| MM_Green13_BMC.Med.Genomics.2011_PMIID.21214954    | Median signature      | PMID.21214954 |
| MM_Red2_BMC.Med.Genomics.2011_PMIID.21214954       | Median signature      | PMID.21214954 |
| MM_Red9_BMC.Med.Genomics.2011_PMIID.21214954       | Median signature      | PMID.21214954 |
| MM_Green11_BMC.Med.Genomics.2011_PMIID.21214954    | Median signature      | PMID.21214954 |
| MM_Red19_BMC.Med.Genomics.2011_PMIID.21214954      | Median signature      | PMID.21214954 |
| MM_Green2_BMC.Med.Genomics.2011_PMIID.21214954     | Median signature      | PMID.21214954 |
| MM_Red16_BMC.Med.Genomics.2011_PMIID.21214954      | Median signature      | PMID.21214954 |
| MM_Green8_BMC.Med.Genomics.2011_PMIID.21214954     | Median signature      | PMID.21214954 |
| MM_Red8_BMC.Med.Genomics.2011_PMIID.21214954       | Median signature      | PMID.21214954 |
| 4p16_Amplicon_BMC.Med.Genomics.2011_PMIID.21214954 | Median signature      | PMID.21214954 |
| MM_Green18_BMC.Med.Genomics.2011_PMIID.21214954    | Median signature      | PMID.21214954 |
| MM_Green16_BMC.Med.Genomics.2011_PMIID.21214954    | Median signature      | PMID.21214954 |
| MM_Red22_BMC.Med.Genomics.2011_PMIID.21214954      | Median signature      | PMID.21214954 |
| MM_Green9_BMC.Med.Genomics.2011_PMIID.21214954     | Median signature      | PMID.21214954 |
| MM_Red12_BMC.Med.Genomics.2011_PMIID.21214954      | Median signature      | PMID.21214954 |

| <b>Signature_ID_paper</b>                                                      | <b>Signature type</b> | <b>PMID</b>   |
|--------------------------------------------------------------------------------|-----------------------|---------------|
| MM_Green15_BMC.Med.Genomics.2011_PMIID.21214954                                | Median signature      | PMID.21214954 |
| MM_Red20_BMC.Med.Genomics.2011_PMIID.21214954                                  | Median signature      | PMID.21214954 |
| MM_Green6_BMC.Med.Genomics.2011_PMIID.21214954                                 | Median signature      | PMID.21214954 |
| MM_Green7_BMC.Med.Genomics.2011_PMIID.21214954                                 | Median signature      | PMID.21214954 |
| MM_Green3_BMC.Med.Genomics.2011_PMIID.21214954                                 | Median signature      | PMID.21214954 |
| MM_Red25_BMC.Med.Genomics.2011_PMIID.21214954                                  | Median signature      | PMID.21214954 |
| MM_Green20_BMC.Med.Genomics.2011_PMIID.21214954                                | Median signature      | PMID.21214954 |
| MVEGFC_BMC.Med.Genomics.2011_PMIID.21214954                                    | Median signature      | PMID.21214954 |
| MM_Green24_BMC.Med.Genomics.2011_PMIID.21214954                                | Median signature      | PMID.21214954 |
| MKRAS_amplicon_BMC.Med.Genomics.2011_PMIID.21214954                            | Median signature      | PMID.21214954 |
| MITO1_BMC.Med.Genomics.2011_PMIID.21214954                                     | Median signature      | PMID.21214954 |
| MM_Red21_BMC.Med.Genomics.2011_PMIID.21214954                                  | Median signature      | PMID.21214954 |
| MM_Green21_BMC.Med.Genomics.2011_PMIID.21214954                                | Median signature      | PMID.21214954 |
| HS_Red5_BMC.Med.Genomics.2011_PMIID.21214954                                   | Median signature      | PMID.21214954 |
| HS_Green10_BMC.Med.Genomics.2011_PMIID.21214954                                | Median signature      | PMID.21214954 |
| HS_Green4_BMC.Med.Genomics.2011_PMIID.21214954                                 | Median signature      | PMID.21214954 |
| HS_Red10_BMC.Med.Genomics.2011_PMIID.21214954                                  | Median signature      | PMID.21214954 |
| HS_Red3_BMC.Med.Genomics.2011_PMIID.21214954                                   | Median signature      | PMID.21214954 |
| GSEA_GP4_MES_ECM.r=0.954_PerouLab_HS_Red7_BMC_Med_Genomics_2011_PMIID.21214954 | Median signature      | PMID.21214954 |
| MM_Green14_BMC.Med.Genomics.2011_PMIID.21214954                                | Median signature      | PMID.21214954 |
| MM_Red11_BMC.Med.Genomics.2011_PMIID.21214954                                  | Median signature      | PMID.21214954 |
| MM_Red4_BMC.Med.Genomics.2011_PMIID.21214954                                   | Median signature      | PMID.21214954 |
| MM_Red18_BMC.Med.Genomics.2011_PMIID.21214954                                  | Median signature      | PMID.21214954 |
| MM_Red24_BMC.Med.Genomics.2011_PMIID.21214954                                  | Median signature      | PMID.21214954 |

| <b>Signature_ID_paper</b>                                                                        | <b>Signature type</b> | <b>PMID</b>   |
|--------------------------------------------------------------------------------------------------|-----------------------|---------------|
| AMPH_EPIREGULIN_Cluster_BMC.Med.Genomics.2011_PMIID.21214954                                     | Median signature      | PMID.21214954 |
| Mmyosin_BMC.Med.Genomics.2011_PMIID.21214954                                                     | Median signature      | PMID.21214954 |
| Unknown_13_BMC.Med.Genomics.2011_PMIID.21214954                                                  | Median signature      | PMID.21214954 |
| 17PP13_Amplicon_BMC.Med.Genomics.2011_PMIID.21214954                                             | Median signature      | PMID.21214954 |
| MHistone_BMC.Med.Genomics.2011_PMIID.21214954                                                    | Median signature      | PMID.21214954 |
| HISTONE_BMC.Med.Genomics.2011_PMIID.21214954                                                     | Median signature      | PMID.21214954 |
| HS_Green23_BMC.Med.Genomics.2011_PMIID.21214954                                                  | Median signature      | PMID.21214954 |
| Unknown_5_BMC.Med.Genomics.2011_PMIID.21214954                                                   | Median signature      | PMID.21214954 |
| FOS_JUN_Cluster_BMC.Med.Genomics.2011_PMIID.21214954                                             | Median signature      | PMID.21214954 |
| Unknown_3_BMC.Med.Genomics.2011_PMIID.21214954                                                   | Median signature      | PMID.21214954 |
| CD34_CD36_Cluster_BMC.Med.Genomics.2011_PMIID.21214954                                           | Median signature      | PMID.21214954 |
| Unknown_15_BMC.Med.Genomics.2011_PMIID.21214954                                                  | Median signature      | PMID.21214954 |
| MAGE_Cluster_BMC.Med.Genomics.2011_PMIID.21214954                                                | Median signature      | PMID.21214954 |
| Secretoglobulin_BMC.Med.Genomics.2011_PMIID.21214954                                             | Median signature      | PMID.21214954 |
| MClaudin_Cluster_BMC.Med.Genomics.2011_PMIID.21214954                                            | Median signature      | PMID.21214954 |
| GSEA_GP9_Cell_cell_adhesion.r=960_PerouLab_MClaudin_Cluster_BMC_Med_Genomics_2011_PMIID.21214954 | Median signature      | PMID.21214954 |
| BASAL_Cluster_BMC.Med.Genomics.2011_PMIID.21214954                                               | Median signature      | PMID.21214954 |
| MRibosomal_BMC.Med.Genomics.2011_PMIID.21214954                                                  | Median signature      | PMID.21214954 |
| Ribosomal_Cluster_BMC.Med.Genomics.2011_PMIID.21214954                                           | Median signature      | PMID.21214954 |
| Chromogranin_BMC.Med.Genomics.2011_PMIID.21214954                                                | Median signature      | PMID.21214954 |
| Unknown_1_BMC.Med.Genomics.2011_PMIID.21214954                                                   | Median signature      | PMID.21214954 |
| 16.13_Amplicon_BMC.Med.Genomics.2011_PMIID.21214954                                              | Median signature      | PMID.21214954 |
| 8p_Amplicon_BMC.Med.Genomics.2011_PMIID.21214954                                                 | Median signature      | PMID.21214954 |
| 19p13_Amplicon_BMC.Med.Genomics.2011_PMIID.21214954                                              | Median signature      | PMID.21214954 |



| <b>Signature_ID_paper</b>                               | <b>Signature type</b> | <b>PMID</b>   |
|---------------------------------------------------------|-----------------------|---------------|
| MM_Green25_BMC.Med.Genomics.2011_PMIID.21214954         | Median signature      | PMID.21214954 |
| Unknown_4_BMC.Med.Genomics.2011_PMIID.21214954          | Median signature      | PMID.21214954 |
| HER2_Amplicon_BMC.Med.Genomics.2011_PMIID.21214954      | Median signature      | PMID.21214954 |
| MPYMT_NEU_Cluster_BMC.Med.Genomics.2011_PMIID.21214954  | Median signature      | PMID.21214954 |
| Fibrinogen_Cluster_BMC.Med.Genomics.2011_PMIID.21214954 | Median signature      | PMID.21214954 |
| MM_Green23_BMC.Med.Genomics.2011_PMIID.21214954         | Median signature      | PMID.21214954 |
| MM_Red10_BMC.Med.Genomics.2011_PMIID.21214954           | Median signature      | PMID.21214954 |
| MM_Red6_BMC.Med.Genomics.2011_PMIID.21214954            | Median signature      | PMID.21214954 |
| MM_Green1_BMC.Med.Genomics.2011_PMIID.21214954          | Median signature      | PMID.21214954 |
| MM_Green17_BMC.Med.Genomics.2011_PMIID.21214954         | Median signature      | PMID.21214954 |
| Unknown_6_BMC.Med.Genomics.2011_PMIID.21214954          | Median signature      | PMID.21214954 |
| HS_Red13_BMC.Med.Genomics.2011_PMIID.21214954           | Median signature      | PMID.21214954 |
| MM_Green4_BMC.Med.Genomics.2011_PMIID.21214954          | Median signature      | PMID.21214954 |
| MM_Green5_BMC.Med.Genomics.2011_PMIID.21214954          | Median signature      | PMID.21214954 |
| HS_Green15_BMC.Med.Genomics.2011_PMIID.21214954         | Median signature      | PMID.21214954 |
| HS_Green3_BMC.Med.Genomics.2011_PMIID.21214954          | Median signature      | PMID.21214954 |
| HS_Red9_BMC.Med.Genomics.2011_PMIID.21214954            | Median signature      | PMID.21214954 |
| HS_Green1_BMC.Med.Genomics.2011_PMIID.21214954          | Median signature      | PMID.21214954 |
| HS_Green7_BMC.Med.Genomics.2011_PMIID.21214954          | Median signature      | PMID.21214954 |
| HS_Red2_BMC.Med.Genomics.2011_PMIID.21214954            | Median signature      | PMID.21214954 |
| HS_Green5_BMC.Med.Genomics.2011_PMIID.21214954          | Median signature      | PMID.21214954 |
| HS_Red23_BMC.Med.Genomics.2011_PMIID.21214954           | Median signature      | PMID.21214954 |
| HS_Red6_BMC.Med.Genomics.2011_PMIID.21214954            | Median signature      | PMID.21214954 |
| HS_Green11_BMC.Med.Genomics.2011_PMIID.21214954         | Median signature      | PMID.21214954 |
| HS_Red17_BMC.Med.Genomics.2011_PMIID.21214954           | Median signature      | PMID.21214954 |

| <b>Signature_ID_paper</b>                                                              | <b>Signature type</b> | <b>PMID</b>   |
|----------------------------------------------------------------------------------------|-----------------------|---------------|
| HS_Green16_BMC.Med.Genomics.2011_PMIID.21214954                                        | Median signature      | PMID.21214954 |
| HS_Red11_BMC.Med.Genomics.2011_PMIID.21214954                                          | Median signature      | PMID.21214954 |
| HS_Red4_BMC.Med.Genomics.2011_PMIID.21214954                                           | Median signature      | PMID.21214954 |
| Unknown_11_BMC.Med.Genomics.2011_PMIID.21214954                                        | Median signature      | PMID.21214954 |
| 15q25_Amplicon_BMC.Med.Genomics.2011_PMIID.21214954                                    | Median signature      | PMID.21214954 |
| HS_Red14_BMC.Med.Genomics.2011_PMIID.21214954                                          | Median signature      | PMID.21214954 |
| MK14_K17_BMC.Med.Genomics.2011_PMIID.21214954                                          | Median signature      | PMID.21214954 |
| GSEA_GP19_1Q_amplicon.r=0.967_PerouLab_HS_Green17_BMC_Med_Genomics_2011_PMIID.21214954 | Median signature      | PMID.21214954 |
| HS_Red22_BMC.Med.Genomics.2011_PMIID.21214954                                          | Median signature      | PMID.21214954 |
| HS_Green20_BMC.Med.Genomics.2011_PMIID.21214954                                        | Median signature      | PMID.21214954 |
| HS_Green22_BMC.Med.Genomics.2011_PMIID.21214954                                        | Median signature      | PMID.21214954 |
| MProtocadherin_BMC.Med.Genomics.2011_PMIID.21214954                                    | Median signature      | PMID.21214954 |
| HS_Green8_BMC.Med.Genomics.2011_PMIID.21214954                                         | Median signature      | PMID.21214954 |
| HS_Red19_BMC.Med.Genomics.2011_PMIID.21214954                                          | Median signature      | PMID.21214954 |
| HS_Red25_BMC.Med.Genomics.2011_PMIID.21214954                                          | Median signature      | PMID.21214954 |
| HS_Green18_BMC.Med.Genomics.2011_PMIID.21214954                                        | Median signature      | PMID.21214954 |
| HS_Green24_BMC.Med.Genomics.2011_PMIID.21214954                                        | Median signature      | PMID.21214954 |
| HS_Green13_BMC.Med.Genomics.2011_PMIID.21214954                                        | Median signature      | PMID.21214954 |
| HS_Green9_BMC.Med.Genomics.2011_PMIID.21214954                                         | Median signature      | PMID.21214954 |
| HS_Red15_BMC.Med.Genomics.2011_PMIID.21214954                                          | Median signature      | PMID.21214954 |
| HS_Green14_BMC.Med.Genomics.2011_PMIID.21214954                                        | Median signature      | PMID.21214954 |
| MITO2_BMC.Med.Genomics.2011_PMIID.21214954                                             | Median signature      | PMID.21214954 |
| HS_Red21_BMC.Med.Genomics.2011_PMIID.21214954                                          | Median signature      | PMID.21214954 |
| HS_Red20_BMC.Med.Genomics.2011_PMIID.21214954                                          | Median signature      | PMID.21214954 |

| <b>Signature_ID_paper</b>                                                                | <b>Signature type</b> | <b>PMID</b>   |
|------------------------------------------------------------------------------------------|-----------------------|---------------|
| HS_Red24_BMC.Med.Genomics.2011_PMIID.21214954                                            | Median signature      | PMID.21214954 |
| HS_Green25_BMC.Med.Genomics.2011_PMIID.21214954                                          | Median signature      | PMID.21214954 |
| Fibroblast_Cluster_BMC.Med.Genomics.2011_PMIID.21214954                                  | Median signature      | PMID.21214954 |
| HS_Green19_BMC.Med.Genomics.2011_PMIID.21214954                                          | Median signature      | PMID.21214954 |
| MM_Green12_BMC.Med.Genomics.2011_PMIID.21214954                                          | Median signature      | PMID.21214954 |
| MM_Red17_BMC.Med.Genomics.2011_PMIID.21214954                                            | Median signature      | PMID.21214954 |
| MSquamous_BMC.Med.Genomics.2011_PMIID.21214954                                           | Median signature      | PMID.21214954 |
| MM_Red13_BMC.Med.Genomics.2011_PMIID.21214954                                            | Median signature      | PMID.21214954 |
| 3p21Amplicon_BMC.Med.Genomics.2011_PMIID.21214954                                        | Median signature      | PMID.21214954 |
| MECM_BMC.Med.Genomics.2011_PMIID.21214954                                                | Median signature      | PMID.21214954 |
| Unknown_16_BMC.Med.Genomics.2011_PMIID.21214954                                          | Median signature      | PMID.21214954 |
| MNB2_BMC.Med.Genomics.2011_PMIID.21214954                                                | Median signature      | PMID.21214954 |
| GSEA_GP22_16Q22_24_amplicon.r=0.927_PerouLab_16q24x_BMC_Med_Genomics_2011_PMIID.21214954 | Median signature      | PMID.21214954 |
| MNB3_BMC.Med.Genomics.2011_PMIID.21214954                                                | Median signature      | PMID.21214954 |
| Unknown_8_BMC.Med.Genomics.2011_PMIID.21214954                                           | Median signature      | PMID.21214954 |
| MBASAL_BMC.Med.Genomics.2011_PMIID.21214954                                              | Median signature      | PMID.21214954 |
| Unknown_7_BMC.Med.Genomics.2011_PMIID.21214954                                           | Median signature      | PMID.21214954 |
| Proliferation_Cluster_BMC.Med.Genomics.2011_PMIID.21214954                               | Median signature      | PMID.21214954 |
| 1p36_Amplicon_BMC.Med.Genomics.2011_PMIID.21214954                                       | Median signature      | PMID.21214954 |
| Unknown_14_BMC.Med.Genomics.2011_PMIID.21214954                                          | Median signature      | PMID.21214954 |
| MProliferation_BMC.Med.Genomics.2011_PMIID.21214954                                      | Median signature      | PMID.21214954 |
| 16q23_Amplicon_BMC.Med.Genomics.2011_PMIID.21214954                                      | Median signature      | PMID.21214954 |
| 11q13_Amplicon_BMC.Med.Genomics.2011_PMIID.21214954                                      | Median signature      | PMID.21214954 |
| S100A9_A8_BMC.Med.Genomics.2011_PMIID.21214954                                           | Median signature      | PMID.21214954 |

| <b>Signature_ID_paper</b>                                          | <b>Signature type</b> | <b>PMID</b>   |
|--------------------------------------------------------------------|-----------------------|---------------|
| 8p22_Amplicon_BMC.Med.Genomics.2011_PMIID.21214954                 | Median signature      | PMID.21214954 |
| 13q14_Amplicon_BMC.Med.Genomics.2011_PMIID.21214954                | Median signature      | PMID.21214954 |
| 12qMDM4_BMC.Med.Genomics.2011_PMIID.21214954                       | Median signature      | PMID.21214954 |
| MNB1_BMC.Med.Genomics.2011_PMIID.21214954                          | Median signature      | PMID.21214954 |
| LUMINAL_Cluster_BMC.Med.Genomics.2011_PMIID.21214954               | Median signature      | PMID.21214954 |
| MM_Red23_BMC.Med.Genomics.2011_PMIID.21214954                      | Median signature      | PMID.21214954 |
| ADM_S100A10_A110NDGR1_Cluster_BMC.Med.Genomics.2011_PMIID.21214954 | Median signature      | PMID.21214954 |
| Unknown_10_BMC.Med.Genomics.2011_PMIID.21214954                    | Median signature      | PMID.21214954 |
| Unknown_12_BMC.Med.Genomics.2011_PMIID.21214954                    | Median signature      | PMID.21214954 |
| MFGFR2_BMC.Med.Genomics.2011_PMIID.21214954                        | Median signature      | PMID.21214954 |
| MM_Green19_BMC.Med.Genomics.2011_PMIID.21214954                    | Median signature      | PMID.21214954 |
| 17q25x_BMC.Med.Genomics.2011_PMIID.21214954                        | Median signature      | PMID.21214954 |
| MN0tch4_BMC.Med.Genomics.2011_PMIID.21214954                       | Median signature      | PMID.21214954 |
| Unknown_9_BMC.Med.Genomics.2011_PMIID.21214954                     | Median signature      | PMID.21214954 |
| MNADH_CYTochrome_BMC.Med.Genomics.2011_PMIID.21214954              | Median signature      | PMID.21214954 |
| MDACC_P53_ER.Pos_CCR.2011_PMIID.21248301                           | Median signature      | PMID.21248301 |
| Early_Response_ER.Neg_27_JAMA.2011_PMIID.21558518                  | Median signature      | PMID.21558518 |
| Excellent_Pathologic_Response_ER.Pos_39_JAMA.2011_PMIID.21558518   | Median signature      | PMID.21558518 |
| Excellent_Pathologic_Response_ER.Neg_55_JAMA.2011_PMIID.21558518   | Median signature      | PMID.21558518 |
| Early_Relapse_ER.Pos_33_JAMA.2011_PMIID.21558518                   | Median signature      | PMID.21558518 |
| Extensive_Residual_Diesase_ER.Neg_54_JAMA.2011_PMIID.21558518      | Median signature      | PMID.21558518 |
| Extensive_Residual_Diesase_ER.Pos_73_JAMA.2011_PMIID.21558518      | Median signature      | PMID.21558518 |
| TNBC_Clinically_Relevant_Good.26_BCR.2011_PMIID.21978456           | Median signature      | PMID.21978456 |
| TNBC_Clinically_Relevant_Poor.26_BCR.2011_PMIID.21978456           | Median signature      | PMID.21978456 |

| <b>Signature_ID_paper</b>                                                        | <b>Signature type</b> | <b>PMID</b>   |
|----------------------------------------------------------------------------------|-----------------------|---------------|
| TNBC_Clinically_Relevant_Good.230_BCR.2011_PMIID.21978456                        | Median signature      | PMID.21978456 |
| 5Q_Breast.Cancer.Res.Treat.2012_PMIID.22048815                                   | Median signature      | PMID.22048815 |
| Wahl_aMaSC_Signature_Cell.Stem.Cell.2012_PMIID.22305568                          | Median signature      | PMID.22305568 |
| Wahl_fMasC_Signature_Cell.Stem.Cell.2012_PMIID.22305568                          | Median signature      | PMID.22305568 |
| Wahl_fSTR_Signature_Cell.Stem.Cell.2012_PMIID.22305568                           | Median signature      | PMID.22305568 |
| PIK3CA.Hutti_Cancer.Res.2012_PMIID.22552288                                      | Median signature      | PMID.22552288 |
| Response_to_PARP_inhibitor_olaparib_Resistance_BC_Res_Treat_2012_PMIID.22875744  | Median signature      | PMID.22875744 |
| Response_to_PARP_inhibitor_olaparib_Sensitivity_BC_Res_Treat_2012_PMIID.22875744 | Median signature      | PMID.22875744 |
| Inflammatory_Breast_Cancer_491_nIBC_CCR.2013_PMIID.23396049                      | Median signature      | PMID.23396049 |
| Inflammatory_Breast_Cancer_79_IBC_CCR.2013_PMIID.23396049                        | Median signature      | PMID.23396049 |
| Inflammatory_Breast_Cancer_491_IBC_CCR.2013_PMIID.23396049                       | Median signature      | PMID.23396049 |
| Inflammatory_Breast_Cancer_79_nIBC_CCR.2013_PMIID.23396049                       | Median signature      | PMID.23396049 |
| Miller_Proliferation_Metagene_Genome_Biol_2013_PMIID.23618380                    | Median signature      | PMID.23618380 |
| C3_TAG_RESPONDING_Usary_Clin.Cancer.Res.2013_PMIID.23780888                      | Median signature      | PMID.23780888 |
| C3_TAG_UNTREATED_Usary_Clin.Cancer.Res.2013_PMIID.23780888                       | Median signature      | PMID.23780888 |
| Vascular.Content_Clin.Exp.Metastasis.2014_PMIID.23975155                         | Median signature      | PMID.23975155 |
| Activate.Endothelium_Clin.Exp.Metastasis.2014_PMIID.23975155                     | Median signature      | PMID.23975155 |
| HGF_up_BCR.2013_PMIID.24025166                                                   | Median signature      | PMID.24025166 |
| HGF_down_BCR.2013_PMIID.24025166                                                 | Median signature      | PMID.24025166 |
| Verhaak_Stromal_Nat.Communit.2013_PMIID.24113773                                 | Median signature      | PMID.24113773 |
| IMMUNE_Bindea_Cell_Normal_mucosa_Immunity.2013_PMIID.24138885                    | Median signature      | PMID.24138885 |
| IMMUNE_Bindea_Cell_SW480_cancer_cells_Immunity.2013_PMIID.24138885               | Median signature      | PMID.24138885 |
| IMMUNE_Bindea_Cell_Lymph_vessels_Immunity.2013_PMIID.24138885                    | Median signature      | PMID.24138885 |
| MM_p53null.Luminal_Genome.Biol.2013_PMIID.24220145                               | Median signature      | PMID.24220145 |

| <b>Signature_ID_paper</b>                                       | <b>Signature type</b> | <b>PMID</b>   |
|-----------------------------------------------------------------|-----------------------|---------------|
| MM_Neu.2012_Genome.Biol.2013_PMID.24220145                      | Median signature      | PMID.24220145 |
| MM_ErbB2.like_Genome.Biol.2013_PMID.24220145                    | Median signature      | PMID.24220145 |
| MM_Stat1_Genome.Biol.2013_PMID.24220145                         | Median signature      | PMID.24220145 |
| MM_Claudinlow_Genome.Biol.2013_PMID.24220145                    | Median signature      | PMID.24220145 |
| MM_Myoepithelioma.like_Genome.Biol.2013_PMID.24220145           | Median signature      | PMID.24220145 |
| MM_Squamous.like_Genome.Biol.2013_PMID.24220145                 | Median signature      | PMID.24220145 |
| MM_p53null.Basal_Genome.Biol.2013_PMID.24220145                 | Median signature      | PMID.24220145 |
| MM_Wnt1.Early_Genome.Biol.2013_PMID.24220145                    | Median signature      | PMID.24220145 |
| MM_C3Tag.2012_Genome.Biol.2013_PMID.24220145                    | Median signature      | PMID.24220145 |
| MM_PyMT.2012_Genome.Biol.2013_PMID.24220145                     | Median signature      | PMID.24220145 |
| MM_Class8_Genome.Biol.2013_PMID.24220145                        | Median signature      | PMID.24220145 |
| MM_Wnt1.Late_Genome.Biol.2013_PMID.24220145                     | Median signature      | PMID.24220145 |
| MM_Class3_Genome.Biol.2013_PMID.24220145                        | Median signature      | PMID.24220145 |
| Endothelial_Normal_EC_high_Angiogenesis_2014_PMID.24257808      | Median signature      | PMID.24257808 |
| Endothelial_Tumor_EC_high_Angiogenesis_2014_PMID.24257808       | Median signature      | PMID.24257808 |
| BPMS_7.Genes_PLoS.One.2013_PMID.24349199                        | Median signature      | PMID.24349199 |
| JANES_Oscillation_JUND_KRT5_Nat.Cell.Biol.2014_PMID.24658685    | Median signature      | PMID.24658685 |
| JANES_Oscillation_GDF11_TGFBR3_Nat.Cell.Biol.2014_PMID.24658685 | Median signature      | PMID.24658685 |
| XBP1_Signature_Nature.2014_PMID.24670641                        | Median signature      | PMID.24670641 |
| Parity_signature_Troester_40_BCR.2014_PMID.25005139             | Median signature      | PMID.25005139 |
| Parity_signature_Troester_251_BCR.2014_PMID.25005139            | Median signature      | PMID.25005139 |
| Knudsen_Neo_ER_negative_Clin.Cancer.Res.2014_PMID.25047707      | Median signature      | PMID.25047707 |
| Knudsen_Neo_common_Clin.Cancer.Res.2014_PMID.25047707           | Median signature      | PMID.25047707 |
| Knudsen_Neo_ER_positive_Clin.Cancer.Res.2014_PMID.25047707      | Median signature      | PMID.25047707 |
| STAT3_Basal_Horvath_SHORT_PNAS.2014_PMID.25139989               | Median signature      | PMID.25139989 |

| <b>Signature_ID_paper</b>                                            | <b>Signature type</b> | <b>PMID</b>   |
|----------------------------------------------------------------------|-----------------------|---------------|
| STAT3_Basal_Horvath_PNAS.2014_PMID.25139989                          | Median signature      | PMID.25139989 |
| IntClust_Amplification.50_Genome.Biol.2014_PMID.25164602             | Median signature      | PMID.25164602 |
| IntClust_Deletion.50.Better.than_Genome.Biol.2014_PMID.25164602      | Median signature      | PMID.25164602 |
| IntClust_Amplification.50.Better.than_Genome.Biol.2014_PMID.25164602 | Median signature      | PMID.25164602 |
| IntClust_Deletion.50_Genome.Biol.2014_PMID.25164602                  | Median signature      | PMID.25164602 |
| Stingl_Down_CLOW_High_Nat.Cell.Biol.2014_PMID.25173976               | Median signature      | PMID.25173976 |
| Stingl_Day7_Downregulated_Nat.Cell.Biol.2014_PMID.25173976           | Median signature      | PMID.25173976 |
| Stingl_Up_Basal_High_Nat.Cell.Biol.2014_PMID.25173976                | Median signature      | PMID.25173976 |
| Stingl_Down_Basal_High_Nat.Cell.Biol.2014_PMID.25173976              | Median signature      | PMID.25173976 |
| Stingl_Up_Proliferation_Nat.Cell.Biol.2014_PMID.25173976             | Median signature      | PMID.25173976 |
| Stingl_Day7_Upregulated_Nat.Cell.Biol.2014_PMID.25173976             | Median signature      | PMID.25173976 |
| MICRORNA_138_Signature_Cancer.Res.2014_PMID.25339353                 | Median signature      | PMID.25339353 |
| CD103_Positive_Cancer.Cell.2014_PMID.25446897                        | Median signature      | PMID.25446897 |
| aMaSC_HsEnriched_Refined1_BCR.2015_PMID.25575446                     | Median signature      | PMID.25575446 |
| Lim2010_MaSC_Adam_PMID.25575446                                      | Median signature      | PMID.25575446 |
| Lim2009_MatureLum_Adam_PMID.25575446                                 | Median signature      | PMID.25575446 |
| Lim2010_MatureLum_Adam_PMID.25575446                                 | Median signature      | PMID.25575446 |
| Spike2012_fStr_PMID.25575446                                         | Median signature      | PMID.25575446 |
| aMaSC_Shehata_BCR.2015_PMID.25575446                                 | Median signature      | PMID.25575446 |
| Shehata2012_Basal_PMID.25575446                                      | Median signature      | PMID.25575446 |
| aStr_Pratt_BCR.2015_PMID.25575446                                    | Median signature      | PMID.25575446 |
| Pfefferle2012_Stroma_PMID.25575446                                   | Median signature      | PMID.25575446 |
| aStr_Shehata_BCR.2015_PMID.25575446                                  | Median signature      | PMID.25575446 |
| Shehata2012_Stroma_PMID.25575446                                     | Median signature      | PMID.25575446 |
| fMaSC.refined1_PMID.25575446                                         | Median signature      | PMID.25575446 |

| <b>Signature_ID_paper</b>                           | <b>Signature type</b> | <b>PMID</b>   |
|-----------------------------------------------------|-----------------------|---------------|
| aMaSC_Lim09_BCR.2015_PMIID.25575446                 | Median signature      | PMID.25575446 |
| Lim2009_MaSC_Adam_PMIID.25575446                    | Median signature      | PMID.25575446 |
| Lim2010_LumProg_Adam_PMIID.25575446                 | Median signature      | PMID.25575446 |
| Keller2012_CD10_Adam_PMIID.25575446                 | Median signature      | PMID.25575446 |
| Lim2010_Stroma_Adam_PMIID.25575446                  | Median signature      | PMID.25575446 |
| LumProg_Lim09_BCR.2015_PMIID.25575446               | Median signature      | PMID.25575446 |
| Lim2009_LumProg_Adam_PMIID.25575446                 | Median signature      | PMID.25575446 |
| LumProg_Pratt_BCR.2015_PMIID.25575446               | Median signature      | PMID.25575446 |
| Pfefferle2012_LumProg_PMIID.25575446                | Median signature      | PMID.25575446 |
| Shehata2012_ALDHneg_PMIID.25575446                  | Median signature      | PMID.25575446 |
| Spike2012_fMaSC_PMIID.25575446                      | Median signature      | PMID.25575446 |
| aStr_HsEnriched_Refined2_BCR.2015_PMIID.25575446    | Median signature      | PMID.25575446 |
| aMaSC_Pratt_BCR.2015_PMIID.25575446                 | Median signature      | PMID.25575446 |
| Pfefferle2012_MaSC_PMIID.25575446                   | Median signature      | PMID.25575446 |
| aStr_HsEnriched_Refined1_BCR.2015_PMIID.25575446    | Median signature      | PMID.25575446 |
| aStr_Lim09_BCR.2015_PMIID.25575446                  | Median signature      | PMID.25575446 |
| Lim2009_Stroma_Adam_PMIID.25575446                  | Median signature      | PMID.25575446 |
| aStr_HsEnriched_BCR.2015_PMIID.25575446             | Median signature      | PMID.25575446 |
| LumProg_HsEnriched_Refined1_BCR.2015_PMIID.25575446 | Median signature      | PMID.25575446 |
| MatureLum_Pratt_BCR.2015_PMIID.25575446             | Median signature      | PMID.25575446 |
| Pfefferle2012_MatureLum_PMIID.25575446              | Median signature      | PMID.25575446 |
| aMaSC_HsEnriched_BCR.2015_PMIID.25575446            | Median signature      | PMID.25575446 |
| MatureLum_HsEnriched_BCR.2015_PMIID.25575446        | Median signature      | PMID.25575446 |
| MatureLum_Shehata_BCR.2015_PMIID.25575446           | Median signature      | PMID.25575446 |
| Shehata2012_NCL_PMIID.25575446                      | Median signature      | PMID.25575446 |



| <b>Signature_ID_paper</b>                                         | <b>Signature type</b> | <b>PMID</b>   |
|-------------------------------------------------------------------|-----------------------|---------------|
| Spike2012_aMaSC_PMIID.25575446                                    | Median signature      | PMID.25575446 |
| LumProg_HsEnriched_BCR.2015_PMIID.25575446                        | Median signature      | PMID.25575446 |
| Shehata2012_ErbB3neg_PMIID.25575446                               | Median signature      | PMID.25575446 |
| MatureLum_Lim09_BCR.2015_PMIID.25575446                           | Median signature      | PMID.25575446 |
| MatureLum_HsEnriched_Refined1_BCR.2015_PMIID.25575446             | Median signature      | PMID.25575446 |
| LumProg_Shehata_BCR.2015_PMIID.25575446                           | Median signature      | PMID.25575446 |
| Shehata2012_ALDHpos_PMIID.25575446                                | Median signature      | PMID.25575446 |
| Shehata2012_LumProg_PMIID.25575446                                | Median signature      | PMID.25575446 |
| MIR_200c_Repressed_ONCO.2015_PMIID.25746005                       | Median signature      | PMID.25746005 |
| MIR_200c_Induced_ONCO.2015_PMIID.25746005                         | Median signature      | PMID.25746005 |
| Up_regulated_upon_N_RAS_repression_Cell_Rep.2015_PMIID.26166574   | Median signature      | PMID.26166574 |
| Up_regulated_by_Oncogenic_N_RAS_Cell_Rep.2015_PMIID.26166574      | Median signature      | PMID.26166574 |
| Down_regulated_upon_N_RAS_repression_Cell_Rep.2015_PMIID.26166574 | Median signature      | PMID.26166574 |
| AGE_associated_SOOD_Genome.Biol.2015_PMIID.26343147               | Median signature      | PMID.26343147 |
| GO_UP_with_SOX10_OE_Cell.Rep.2015_PMIID.26365194                  | Median signature      | PMID.26365194 |
| GO_DOWN_with_SOX10_OE_Cell.Rep.2015_PMIID.26365194                | Median signature      | PMID.26365194 |
| TCGA.BRCA.1198_UNKNOWN6_Cell.2015_PMIID.26451490                  | Median signature      | PMID.26451490 |
| TCGA.BRCA.1198_NORMAL_Cell.2015_PMIID.26451490                    | Median signature      | PMID.26451490 |
| TCGA.BRCA.1198_UNKNOWN3_Cell.2015_PMIID.26451490                  | Median signature      | PMID.26451490 |
| TCGA.BRCA.1198_COLLAGEN11A_Cell.2015_PMIID.26451490               | Median signature      | PMID.26451490 |
| TCGA.BRCA.1198_TP63_Cell.2015_PMIID.26451490                      | Median signature      | PMID.26451490 |
| TCGA.BRCA.1198_LUMINAL_Cell.2015_PMIID.26451490                   | Median signature      | PMID.26451490 |
| LOBULAR_TCGA_SIGNATURE_Reactive_like_Cell.2015_PMIID.26451490     | Median signature      | PMID.26451490 |
| TCGA.BRCA.1198_S100A7_8_9_Cell.2015_PMIID.26451490                | Median signature      | PMID.26451490 |
| LOBULAR_TCGA_SIGNATURE_Immune_related_Cell.2015_PMIID.26451490    | Median signature      | PMID.26451490 |

| <b>Signature_ID_paper</b>                                          | <b>Signature type</b> | <b>PMID</b>   |
|--------------------------------------------------------------------|-----------------------|---------------|
| TCGA.BRCA.1198_IL8_CCL_Cell.2015_PMIID.26451490                    | Median signature      | PMID.26451490 |
| TCGA.BRCA.1198_FGFR4_EGF_Cell.2015_PMIID.26451490                  | Median signature      | PMID.26451490 |
| TCGA.BRCA.1198_HOXC11_HOTAIR_SIX1_Cell.2015_PMIID.26451490         | Median signature      | PMID.26451490 |
| TCGA.BRCA.1198_UNKNOWN2_Cell.2015_PMIID.26451490                   | Median signature      | PMID.26451490 |
| TCGA.BRCA.1198_NORMAL2_Cell.2015_PMIID.26451490                    | Median signature      | PMID.26451490 |
| TCGA.BRCA.1198_HISTONES_Cell.2015_PMIID.26451490                   | Median signature      | PMID.26451490 |
| TCGA.BRCA.1198_Chromogranin_Cell.2015_PMIID.26451490               | Median signature      | PMID.26451490 |
| TCGA.BRCA.1198_BASAL_Cell.2015_PMIID.26451490                      | Median signature      | PMID.26451490 |
| LOBULAR_TCGA_SUBTYPE_Proliferative_Cell.2015_PMIID.26451490        | Median signature      | PMID.26451490 |
| TCGA.BRCA.1198_PDCHA_MANY_Cell.2015_PMIID.26451490                 | Median signature      | PMID.26451490 |
| TCGA.BRCA.1198_EN1_FDZ9_Cell.2015_PMIID.26451490                   | Median signature      | PMID.26451490 |
| TCGA.BRCA.1198_UNKNOWN1_Cell.2015_PMIID.26451490                   | Median signature      | PMID.26451490 |
| TCGA.BRCA.1198_MYBL2_APOBEC3B_Cell.2015_PMIID.26451490             | Median signature      | PMID.26451490 |
| LOBULAR_TCGA_SUBTYPE_Immune_related_Cell.2015_PMIID.26451490       | Median signature      | PMID.26451490 |
| TCGA.BRCA.1198_UNKNOWN5_Cell.2015_PMIID.26451490                   | Median signature      | PMID.26451490 |
| LOBULAR_TCGA_SUBTYPE_Reactive_like_Cell.2015_PMIID.26451490        | Median signature      | PMID.26451490 |
| GSEA_GP21_Anti_apoptosis_DNA_stability.r=0.898_MORF_STK17A         | Median signature      | PMID.26771021 |
| GSEA_CASPASE_CASCADE_APOPTOSIS_SA                                  | Median signature      | PMID.26771022 |
| GSEA_GP21_Anti_apoptosis_DNA_stability.r=0.925_MORF_MT4            | Median signature      | PMID.26771023 |
| GSEA_GP18_Vesicle_EPR_membrane_coat.r=0.877_MEMBRANE_COAT          | Median signature      | PMID.26771024 |
| GSEA_BIOCARTA_RB_PATHWAY                                           | Median signature      | PMID.26771025 |
| GSEA_RETINOL_METABOLISM_KEGG                                       | Median signature      | PMID.26771026 |
| GSEA_GP3_Tumor_suppressing_miRNA_targets.r=0.940_GTTTGTT.MIR_495   | Median signature      | PMID.26771027 |
| GSEA_GP12_Hypoxia_glycolosis.r=0.939_SEMENZA_HIF1_TARGETS          | Median signature      | PMID.26771028 |
| GSEA_GP1_Proliferation_DNA_repair.r=0.981_PUJANA_CHEK2_PCC_NETWORK | Median signature      | PMID.26771029 |

| <b>Signature_ID_paper</b>                                                                            | <b>Signature type</b> | <b>PMID</b>   |
|------------------------------------------------------------------------------------------------------|-----------------------|---------------|
| GSEA_RESPONSE_TO_ANDROGEN_UP_NELSON                                                                  | Median signature      | PMID.26771030 |
| GSEA_GP20_TAL1_Leukemia_erythropoiesis.r=0.935_GNF2_TAL1                                             | Median signature      | PMID.26771031 |
| GSEA_BIOCARTA_RAS_PATHWAY                                                                            | Median signature      | PMID.26771032 |
| GSEA_GP3_Tumor_suppressing_miRNA_targets.r=0.952_DACOSTA_UV_RESPONSE_VIA_ERCC3_DN                    | Median signature      | PMID.26771033 |
| GSEA_GP8_FOXO_stemness.r=0.931_TTGTTT_V\$FOXO4_01                                                    | Median signature      | PMID.26771034 |
| GSEA_MTOR_PATHWAY_BIOCARTA                                                                           | Median signature      | PMID.26771035 |
| GSEA_BIOCARTA_VEGF_PATHWAY                                                                           | Median signature      | PMID.26771036 |
| GSEA_BIOCARTA_PTEN_PATHWAY                                                                           | Median signature      | PMID.26771037 |
| GSEA_GP10_Fatty_acid_oxidation.r=0.930_CARBOXYLIC_ACID_METABOLIC_PROCESS                             | Median signature      | PMID.26771038 |
| GSEA_IGF1R_PATHWAY_BIOCARTA                                                                          | Median signature      | PMID.26771039 |
| GSEA_GP16_Protein_kinase_signaling_MAPKs.r=0.893_INTRACELLULAR_SIGNALING_CASCADE                     | Median signature      | PMID.26771040 |
| GSEA_GP21_Anti_apoptosis_DNA_stability.r=0.877_MORF_BCL2                                             | Median signature      | PMID.26771041 |
| GSEA_GP6_Squamous_differentiation_development.r=0.902_RICKMAN_TUMOR_DIFFERENTIATED_WELL_VS_POORLY_DN | Median signature      | PMID.26771042 |
| GSEA_BIOCARTA_ALK_PATHWAY                                                                            | Median signature      | PMID.26771043 |
| GSEA_GP14_Plasma_membrane_cell_cell_signaling.r=0.925_MORF_CNTN1                                     | Median signature      | PMID.26771044 |
| GSEA_GP8_FOXO_stemness.r=0.875_MORF_PTPRB                                                            | Median signature      | PMID.26771045 |
| GSEA_BIOCARTA_AKT_PATHWAY                                                                            | Median signature      | PMID.26771046 |
| GSEA_HDAC_TARGETS_DN_HELLER                                                                          | Median signature      | PMID.26771047 |
| GSEA_GP1_Proliferation_DNA_repair.r=0.972_REACTOME_CELL_CYCLE_MITOTIC                                | Median signature      | PMID.26771048 |
| GSEA_GP7_Estrogen_signaling.r=0.97_SMID_BREAST_CANCER_BASAL_DN                                       | Median signature      | PMID.26771049 |
| GSEA_BIOCARTA_BRCA_ATR_PATHWAY_ATRBRCA                                                               | Median signature      | PMID.26771050 |
| GSEA_GP13_Neural_signaling.r=0.959_MODULE_100                                                        | Median signature      | PMID.26771051 |
| GSEA_GP16_Protein_kinase_signaling_MAPKs.r=0.885_REGULATION_OF_KINASE_ACTIVITY                       | Median signature      | PMID.26771052 |

| <b>Signature_ID_paper</b>                                                                     | <b>Signature type</b> | <b>PMID</b>   |
|-----------------------------------------------------------------------------------------------|-----------------------|---------------|
| GSEA_GP17_Basal_signaling.r=0.958_SMID_BREAST_CANCER_BASAL_UP                                 | Median signature      | PMID.26771053 |
| GSEA_GP3_Tumor_suppressing_miRNA_targets.r=0.940_TGCTTTG.MIR_330                              | Median signature      | PMID.26771054 |
| GSEA_GP13_Neural_signaling.r=0.894_NERVOUS_SYSTEM_DEVELOPMENT                                 | Median signature      | PMID.26771055 |
| GSEA_PI3K_CASCADE_REACTOME                                                                    | Median signature      | PMID.26771056 |
| GSEA_MYC_amplified_chr8q24                                                                    | Median signature      | PMID.26771057 |
| FOXC1_Hair_Follicles_Wang_SCIENCE.2016_P30C.LO.vs.WT_Negative_PMID.26912704                   | Median signature      | PMID.26912704 |
| FOXC1_Hair_Follicles_Wang_SCIENCE.2016_P30C.LO.vs.WT_Positive_PMID.26912704                   | Median signature      | PMID.26912704 |
| Early_IRS_1_PLoS.One.2016_PMID.26991655                                                       | Median signature      | PMID.26991655 |
| Early_IRS_2_PLoS.One.2016_PMID.26991655                                                       | Median signature      | PMID.26991655 |
| Late_IRS_2_PLoS.One.2016_PMID.26991655                                                        | Median signature      | PMID.26991655 |
| Late_IRS_1_PLoS.One.2016_PMID.26991655                                                        | Median signature      | PMID.26991655 |
| Tumour_hypoxia_causes_DNA_hypermethylation_by_reducing_TET_activity_Nature.2016_PMID.27533040 | Median signature      | PMID.27533040 |
| Necrosis_J.Pathol.2017_PMID.27861902                                                          | Median signature      | PMID.27861902 |
| Mitotic_Count_J.Pathol.2017_PMID.27861902                                                     | Median signature      | PMID.27861902 |
| Apocrine_Features_J.Pathol.2017_PMID.27861902                                                 | Median signature      | PMID.27861902 |
| Histological_Grade_J.Pathol.2017_PMID.27861902                                                | Median signature      | PMID.27861902 |
| Epithelial_Tubule_Formation_J.Pathol.2017_PMID.27861902                                       | Median signature      | PMID.27861902 |
| Ductal_Carcinoma_In_Situ_J.Pathol.2017_PMID.27861902                                          | Median signature      | PMID.27861902 |
| Stromal_Central_Fibrotic_Focus_J.Pathol.2017_PMID.27861902                                    | Median signature      | PMID.27861902 |
| Nuclear_Pleomorphism_J.Pathol.2017_PMID.27861902                                              | Median signature      | PMID.27861902 |
| Lobular_Carcinoma_In_Situ_J.Pathol.2017_PMID.27861902                                         | Median signature      | PMID.27861902 |
| Lymphovascular_Invasion_J.Pathol.2017_PMID.27861902                                           | Median signature      | PMID.27861902 |
| YALE_PIK3CA_Pathway_Ann.Oncol.2017_PMID.28177460                                              | Median signature      | PMID.28177460 |
| YALE_RHOA_pathway_Ann.Oncol.2017_PMID.28177460                                                | Median signature      | PMID.28177460 |

| <b>Signature_ID_paper</b>                                                     | <b>Signature type</b> | <b>PMID</b>   |
|-------------------------------------------------------------------------------|-----------------------|---------------|
| PR_Isoform_Ratio_Up_in_PRB_H_JNCI.2017_PMIID.28376177                         | Median signature      | PMID.28376177 |
| PR_Isoform_Ratio_Up_in_PRA_H_JNCI.2017_PMIID.28376177                         | Median signature      | PMID.28376177 |
| PARP_Sensitivity_Signature_POSITIVE_Sci.Adv.2017_PMIID.28439535               | Median signature      | PMID.28439535 |
| PARP_Sensitivity_Signature_NEGATIVE_Sci.Adv.2017_PMIID.28439535               | Median signature      | PMID.28439535 |
| African_and_European_Ancestry_in_TCGA_Positive_JAMA.Oncol.2017_PMIID.28472234 | Median signature      | PMID.28472234 |
| African_and_European_Ancestry_in_TCGA_Negative_JAMA.Oncol.2017_PMIID.28472234 | Median signature      | PMID.28472234 |
| PARP_sensitivity_MDACC_NPJ.Syst.Biol.Appl._2017_PMIID.28649435                | Median signature      | PMID.28649435 |
| GENE_PANEL_UNCSEQ_7.1_Oncologist.2018_PMIID.29158372                          | Median signature      | PMID.29158372 |
| MET_DOWN_Significant_Genes_LOW_BASALS_1_Genes_JCI.2018_PMIID.29480819         | Median signature      | PMID.29480819 |
| MET_UP_RNA_Seq_Significant_Genes_JCI.2018_PMIID.29480819                      | Median signature      | PMID.29480819 |
| MET_DOWN_Significant_Genes_LOW_BASALS_2_Genes_JCI.2018_PMIID.29480819         | Median signature      | PMID.29480819 |
| MET_DOWN_RNA_Seq_Significant_Genes_JCI.2018_PMIID.29480819                    | Median signature      | PMID.29480819 |
| MET_UP_Significant_Genes_HIGH_BASALS_Genes_JCI.2018_PMIID.29480819            | Median signature      | PMID.29480819 |
| Durvalumab_signature_Higgs_Clin.Cancer.Res.2018_PMIID.29716923                | Median signature      | PMID.29716923 |
| REPLICATION_STRESS_DOWN_SET_Cell.Rep.2018_PMIID.29768207                      | Median signature      | PMID.29768207 |
| REPLICATION_STRESS_UP_SET_Cell.Rep.2018_PMIID.29768207                        | Median signature      | PMID.29768207 |
| MAPK_pathway_activation_Wagle_NPJ.Precis.Oncol.2018_PMIID.29872725            | Median signature      | PMID.29872725 |
| fMaSC_Metab8_CellRep.2018_PMIID.30089273                                      | Median signature      | PMID.30089273 |
| fMaSC_Metab_CellRep.2018_PMIID.30089273                                       | Median signature      | PMID.30089273 |
| fMaSC_Signature_CellRep.2018_PMIID.30089273                                   | Median signature      | PMID.30089273 |
| ACTIVATED_CANCER_CELL_SIGNATURE_Nat.Cell.Biol.2019_PMIID.31263265             | Median signature      | PMID.31263265 |
| ACTIVATED_LUNG_MSC_SIGNATURE_Nat.Cell.Biol.2019_PMIID.31263265                | Median signature      | PMID.31263265 |
